# Supplementary material for: Detection of QTLs for panicle-related traits using an indica × japonica recombinant inbred line population in rice
Source: PeerJ. 2021 Nov 29;9:e12504. doi: 10.7717/peerj.12504 (PMC8638570; doi:10.7717/peerj.12504)
Supplement: Supplemental Information 4 [file peerj-09-12504-s004.xlsx]

## Sheet: Genotype
Line	RM1282	RM1247	JD1014	JD1015	JD1016	JD1006	JD1007	RM10609	RM3412	RM7075	RM8139	RM11295	RM11504	JD1003	JD1004	RM1003	RM3403	RM8232	JD1008	JD1009	D1019	RM6840	RM6367	RM12570	RM6378	W236	W004	RM12987	RM6374	JD2001	JD2002	JD2011	JD2029	JD2006	RM1367	RM6	JD2008	JD2009	JD2010	JD3013	JD3002	JD3011	JD3012	RM2421	RM3131	JD3005	JD3006	RM6080	RM6914
K1	B	B	B	B	A	A	A	B	B	B	B	B	B	B	B	A	A	A	A	A	B	B	A	A	A	A	A	A	A	A	A	A	A	A	A	A	A	A	A	B	B	B	B	A	A	A	A	A	A
K2	B	B	B	B	B	B	B	B	B	B	B	B	B	B	B	B	B	B	A	A	B	B	A	A	A	A	A	A	A	B	B	B	B	A	A	A	B	B	B	B	B	B	B	B	B	B	A	A	A
K3	B	B	B	B	A	A	B	B	B	B	B	B	B	B	B	B	B	B	B	B	B	B	B	B	B	B	B	B	B	B	B	B	B	B	B	B	B	B	B	A	A	B	B	-	B	A	A	A	A
K4	A	B	B	B	B	B	B	-	B	B	-	B	B	B	B	B	B	B	B	B	B	B	A	A	A	B	B	B	B	B	B	B	B	B	B	B	B	B	B	A	A	B	B	B	B	B	B	A	A
K5	A	A	A	A	A	A	A	A	-	B	B	B	B	B	B	B	B	B	B	B	B	-	-	A	A	A	A	A	-	-	-	-	-	-	A	A	A	A	A	B	B	B	B	-	A	A	A	A	A
K6	A	A	A	A	A	A	A	A	A	A	A	A	A	A	A	A	A	A	A	A	A	A	A	B	B	B	B	B	B	B	B	B	B	B	B	A	A	A	A	A	A	A	A	A	A	A	A	A	A
K7	A	A	A	A	A	A	A	A	A	-	A	A	A	A	A	A	A	A	A	B	B	B	B	B	A	A	A	A	A	A	A	A	A	B	B	-	A	A	A	A	A	A	A	A	A	A	A	B	B
K8	B	B	B	B	B	A	B	A	A	A	A	A	B	B	B	B	A	A	A	A	A	B	B	B	B	B	A	A	B	B	B	B	B	B	B	B	A	B	B	B	B	B	B	B	B	A	A	A	A
K9	A	B	B	B	B	B	B	B	B	B	B	B	B	B	B	B	B	B	B	B	B	B	A	A	B	B	A	A	A	B	B	B	B	A	A	A	B	B	B	A	A	A	A	A	A	A	A	A	A
K10	A	A	A	A	A	A	B	B	B	B	-	B	B	B	A	A	A	A	A	A	A	A	B	B	B	B	B	B	B	B	B	B	B	B	A	A	A	A	A	A	A	A	A	A	A	A	A	A	A
K11	A	A	A	A	A	A	A	B	B	B	B	B	B	A	A	B	B	B	B	B	B	B	A	A	A	A	A	A	A	A	A	A	A	A	A	A	A	A	A	B	B	B	B	B	B	B	B	B	B
K12	A	A	A	A	A	A	A	A	A	A	A	A	B	B	B	B	B	B	B	B	B	B	B	B	B	B	B	B	B	B	B	B	B	B	A	A	A	A	A	A	A	A	A	A	A	A	A	A	A
K13	B	B	B	B	B	B	A	A	A	B	B	B	A	A	A	B	B	B	B	B	B	B	A	A	-	-	-	A	A	A	A	A	A	B	B	B	B	B	B	A	A	A	A	A	A	A	B	A	A
K14	B	B	B	B	B	B	B	A	A	A	A	B	B	B	B	B	B	A	A	A	A	A	B	B	A	A	-	-	B	-	-	-	B	B	B	B	B	B	B	B	B	B	A	A	A	A	A	A	A
K15	A	A	A	A	A	A	A	-	A	A	A	A	B	B	B	B	B	A	B	B	A	A	B	B	A	B	B	B	B	B	B	B	-	-	A	A	A	A	A	A	A	A	A	A	A	A	A	A	A
K16	B	B	A	A	A	B	B	-	B	B	-	A	B	B	B	B	B	B	-	A	A	A	B	B	B	B	B	B	B	B	B	B	B	B	B	B	B	B	B	A	A	A	A	A	A	A	B	A	B
K17	A	A	A	A	A	A	A	A	A	A	A	A	A	A	A	A	A	A	A	A	A	A	B	A	A	B	B	B	B	B	B	B	B	B	B	B	B	B	B	A	A	A	A	A	A	A	A	B	B
K18	B	B	A	A	A	A	A	A	A	A	A	A	B	B	B	B	B	A	A	A	A	A	B	B	B	B	B	B	B	B	B	B	B	B	B	B	B	A	A	A	A	A	A	A	A	A	B	B	A
K19	B	B	B	B	B	B	A	A	A	A	A	A	A	A	A	B	B	B	B	B	B	A	B	B	A	A	A	A	A	A	A	A	A	A	A	A	A	A	A	B	B	B	B	B	A	A	A	A	A
K20	A	A	A	A	A	A	A	A	B	A	A	A	A	B	B	B	B	A	A	A	A	A	A	A	A	B	B	B	A	A	A	A	A	A	A	A	A	A	A	A	A	A	B	A	A	A	A	A	A
K21	A	A	A	A	A	A	A	A	A	A	A	B	B	B	B	A	A	A	A	A	B	B	B	B	B	B	B	B	B	B	B	A	A	A	B	B	B	B	B	B	B	B	B	A	A	A	A	A	A
K22	A	A	A	A	A	A	A	A	B	B	A	A	A	A	A	A	A	A	A	A	A	A	B	B	B	B	B	B	B	B	B	B	B	B	B	B	B	B	B	B	B	A	A	A	A	A	A	A	A
K23	B	B	B	B	B	A	A	A	A	B	A	A	A	A	B	B	B	B	B	B	B	B	B	B	B	B	B	B	B	B	B	B	B	B	B	B	B	A	A	A	A	A	A	A	B	A	B	B	B
K24	B	B	B	B	B	B	B	B	B	B	B	B	B	B	B	B	B	B	B	A	B	B	A	A	A	B	B	B	B	B	B	B	B	B	A	A	A	A	A	B	B	B	B	B	B	B	B	A	A
K25	B	B	A	A	A	A	A	A	A	A	A	A	B	B	B	B	A	A	A	B	A	A	B	A	A	A	A	B	B	B	B	A	B	B	B	B	B	A	A	B	B	B	B	B	B	A	B	A	A
K26	A	A	A	A	A	A	A	A	A	A	A	A	A	A	A	A	A	A	A	A	B	B	A	A	A	A	A	B	B	B	B	B	B	B	B	-	A	B	B	A	A	A	A	A	A	A	A	A	A
K27	B	B	A	A	A	A	A	-	A	A	A	A	B	B	B	B	B	A	A	A	A	A	B	B	B	B	B	B	B	B	B	B	B	B	B	B	B	A	A	A	A	A	A	A	A	A	B	B	A
K28	A	A	A	A	A	A	A	-	B	B	B	A	A	A	A	A	A	B	B	B	B	B	B	B	B	B	B	B	B	B	B	B	B	B	B	B	B	B	B	B	B	B	B	B	A	A	A	B	B
K29	B	B	-	-	B	-	A	B	B	B	B	B	B	A	A	A	A	A	B	B	B	B	B	B	B	B	B	-	A	-	A	A	A	A	A	A	A	B	B	A	B	B	B	A	A	A	A	A	A
K30	A	A	A	A	A	A	A	A	A	A	A	B	A	A	A	A	A	A	A	A	A	A	A	A	B	B	B	B	B	-	B	A	A	A	A	A	B	B	A	B	B	B	B	B	A	A	A	A	A
K31	B	B	B	B	B	B	B	-	B	B	-	B	B	B	B	B	B	B	B	B	A	A	B	B	B	B	B	-	A	-	A	A	A	A	A	A	B	B	B	A	B	B	B	-	B	A	A	A	A
K32	A	A	A	A	A	A	A	A	A	A	A	A	B	B	B	B	B	A	A	A	B	B	A	A	A	A	A	B	B	B	B	B	B	B	B	B	B	B	B	B	B	B	B	B	A	A	A	A	-
K33	B	B	B	-	A	A	A	A	-	A	A	A	A	B	A	A	A	A	A	A	-	-	B	B	A	A	A	A	A	B	B	B	B	B	B	B	B	B	B	B	A	A	A	A	A	A	A	B	B
K34	A	A	A	A	A	B	B	B	B	B	B	B	B	A	A	B	A	A	A	B	B	B	A	A	A	A	A	A	A	A	A	A	B	A	A	A	A	A	A	A	A	A	A	A	A	A	A	A	A
K35	B	B	B	B	B	B	A	A	-	B	B	A	A	A	A	B	A	B	B	B	A	A	A	A	A	A	A	A	A	A	A	A	A	A	A	A	A	A	A	B	B	B	B	B	A	B	B	A	A
K36	B	B	B	B	B	B	A	B	B	B	B	B	B	B	A	B	A	A	A	A	B	B	A	A	A	B	B	B	B	B	B	B	B	B	B	B	B	B	B	A	A	A	A	A	A	A	A	A	A
K37	B	A	A	A	A	A	A	A	A	A	A	A	B	B	B	B	A	A	A	A	A	A	-	B	A	B	B	B	B	B	B	B	B	B	B	A	B	B	B	B	B	B	B	B	B	A	A	A	A
K38	B	B	-	-	-	A	B	A	A	A	A	A	A	A	A	A	A	A	A	A	A	A	B	A	B	A	-	-	B	-	B	B	A	A	A	A	A	A	A	-	-	-	B	-	-	-	A	-	A
K39	B	B	A	A	A	B	A	A	A	B	-	B	B	B	B	A	A	B	B	B	A	A	B	B	B	B	B	B	B	-	B	B	A	A	B	A	-	-	B	A	B	B	B	B	A	A	A	A	A
K40	B	B	B	A	A	A	A	A	B	B	B	B	A	A	A	A	A	A	B	A	B	B	A	A	A	A	A	A	A	A	A	A	A	A	A	A	A	A	A	A	A	A	A	A	A	A	A	A	A
K41	A	A	A	A	A	A	A	B	B	B	B	A	A	A	A	A	A	B	B	B	A	A	B	B	A	A	B	B	B	B	B	B	B	B	B	B	B	B	B	A	A	A	A	A	A	A	-	A	A
K42	B	B	B	A	A	A	A	B	B	B	B	B	B	B	B	B	B	B	B	B	B	B	A	A	A	A	A	A	A	A	A	A	A	A	A	A	A	A	A	A	A	A	A	A	A	A	A	A	A
K43	B	B	B	-	-	-	-	-	-	A	A	A	A	A	B	B	B	B	B	B	A	A	B	A	A	A	A	A	A	A	A	A	A	A	A	A	A	A	A	B	B	B	B	B	A	A	A	A	A
K44	A	A	A	A	A	A	A	A	A	A	A	A	A	A	A	A	A	A	A	A	A	A	B	A	A	A	A	A	A	B	B	B	A	A	A	A	A	A	B	B	B	B	B	B	B	B	B	B	B
K45	A	A	A	A	A	A	A	A	A	A	A	A	A	B	B	A	A	A	A	A	A	B	A	A	B	B	B	B	B	B	B	B	B	B	B	B	B	B	B	B	B	B	B	B	A	A	A	A	A
K46	B	B	B	B	B	B	A	A	A	A	A	A	A	A	A	B	B	B	B	B	B	A	B	B	A	A	A	A	A	A	A	A	A	A	A	A	A	A	A	B	B	B	B	B	A	A	A	A	A
K47	-	-	-	-	-	B	B	B	B	B	B	B	B	B	A	A	A	A	A	A	A	A	A	A	A	B	B	B	B	B	B	B	B	B	B	B	B	B	B	A	A	A	A	A	A	A	A	A	A
K48	A	A	A	A	A	A	A	A	A	A	A	B	A	A	A	A	A	A	A	A	B	B	A	A	A	A	A	-	A	B	B	B	A	A	A	A	A	A	B	B	B	B	B	B	B	B	B	A	A
K49	A	B	B	B	B	A	A	A	A	B	B	B	B	A	A	B	A	B	B	B	B	B	A	A	A	A	A	A	A	A	A	A	A	A	A	B	B	B	A	A	A	A	A	A	B	A	A	A	A
K50	-	-	-	-	-	-	-	B	B	B	B	B	B	B	B	A	B	B	B	B	B	A	A	A	-	-	A	A	A	A	A	A	B	A	B	B	B	B	A	B	B	B	B	B	B	A	A	-	B
K51	B	B	B	B	B	B	B	-	B	B	B	B	B	B	B	A	B	B	B	B	B	A	A	A	A	A	A	A	A	A	A	A	B	A	B	B	B	B	B	B	A	A	A	A	A	A	A	B	B
K52	A	A	B	A	A	B	B	B	B	B	B	B	A	A	A	A	A	A	B	A	A	A	B	B	B	B	B	B	B	B	B	A	A	B	B	B	B	B	B	B	B	B	A	A	A	A	A	A	A
K53	A	A	A	A	A	A	A	A	A	B	B	B	B	B	B	B	B	B	B	B	B	B	B	A	A	A	A	A	A	A	A	A	A	B	B	B	B	B	B	A	A	A	A	A	A	A	A	B	B
K54	B	B	B	B	B	A	A	A	A	A	A	B	B	B	B	B	B	B	B	B	B	B	A	A	A	A	A	A	B	B	B	A	A	B	B	B	B	B	B	A	A	B	B	B	B	A	B	B	B
K55	A	A	A	A	A	A	A	A	A	A	A	A	B	B	B	B	B	B	B	B	B	A	B	A	A	A	A	A	A	B	A	B	B	A	A	A	A	A	A	B	B	B	B	B	B	A	A	A	A
K56	A	A	A	A	A	A	A	A	A	A	A	B	B	A	A	A	A	A	A	A	B	B	A	A	A	A	A	A	A	A	A	A	A	A	A	A	A	A	A	A	A	A	A	A	A	A	B	A	A
K57	B	B	B	B	B	B	B	A	A	A	A	A	A	A	A	A	A	A	A	A	B	B	A	A	A	A	A	A	A	A	A	A	A	A	A	A	B	B	B	A	A	A	A	A	A	A	A	B	B
K58	A	A	A	A	A	A	A	A	A	A	A	B	B	A	A	A	A	A	B	B	A	A	B	A	-	-	-	-	-	B	B	B	B	B	A	A	A	A	A	A	A	A	A	A	A	A	A	A	A
K59	B	B	B	B	B	B	A	A	A	A	A	A	A	A	A	A	A	A	A	A	A	A	B	B	B	B	B	A	A	A	A	A	A	A	A	A	A	A	A	A	A	A	A	A	A	A	A	A	A
K60	A	A	A	B	B	B	B	B	B	B	B	B	A	A	A	B	B	B	A	A	B	B	A	A	A	A	A	A	B	B	B	B	B	B	B	B	B	B	B	A	A	A	A	B	A	A	A	A	A
K61	A	A	B	B	B	B	B	B	A	A	A	A	A	A	A	A	B	B	B	B	B	B	B	B	B	B	B	A	A	A	A	A	A	B	B	B	B	B	B	B	B	B	B	B	B	A	A	A	A
K62	B	A	A	B	A	A	A	-	A	A	A	A	A	A	A	A	B	B	A	A	A	A	B	B	B	B	B	B	B	B	B	A	A	A	A	A	A	A	A	A	A	A	B	B	B	A	A	A	A
K63	A	A	A	A	A	A	-	-	B	B	B	B	B	B	B	B	B	A	A	A	A	A	A	A	-	-	-	A	B	B	B	B	B	B	A	A	A	A	A	A	A	A	A	A	A	A	A	A	B
K64	A	A	A	A	A	A	A	B	B	B	B	B	B	B	B	B	B	B	B	A	A	A	B	B	B	B	B	B	B	B	B	B	A	A	A	A	A	A	A	B	B	-	A	B	B	A	A	-	-
K65	-	-	B	B	B	A	-	A	A	-	-	B	B	A	A	A	A	B	B	B	A	A	A	A	A	A	A	A	A	A	A	A	A	A	B	B	A	A	A	B	B	B	B	-	A	A	A	A	A
K66	A	A	A	A	A	A	A	B	B	B	B	B	A	A	A	A	A	A	A	A	A	B	B	A	A	A	A	A	A	A	A	A	A	A	A	B	B	B	B	B	B	-	A	A	A	A	A	A	A
K67	B	B	B	B	B	B	A	-	B	B	B	A	A	A	A	A	A	A	A	A	A	A	B	B	B	B	B	B	B	B	B	B	B	B	B	B	B	B	A	B	B	-	B	B	A	A	A	A	A
K68	B	B	B	B	B	A	A	A	B	B	B	A	B	B	A	A	A	B	B	B	B	B	B	A	A	A	A	B	B	B	B	B	B	B	B	B	B	B	A	A	A	A	A	A	A	A	B	B	A
K69	A	A	A	A	A	A	A	B	B	B	B	B	B	B	B	B	B	B	B	B	A	-	A	A	A	A	A	A	A	A	A	B	B	B	B	B	B	B	B	B	B	B	B	B	B	B	B	A	B
K70	A	A	A	A	A	B	B	B	A	A	A	A	A	B	A	A	A	B	B	B	B	B	A	A	A	B	B	B	B	B	B	B	A	B	A	B	B	A	A	B	B	-	B	B	A	A	A	A	A
K71	A	A	A	A	A	A	A	A	A	A	A	A	A	A	A	A	A	A	A	A	A	A	A	B	-	A	A	A	A	A	A	A	-	B	B	B	-	-	-	B	B	A	A	A	A	A	A	A	A
K72	A	A	A	A	A	A	A	B	B	B	-	B	B	B	B	B	B	B	B	B	B	B	A	B	B	B	B	B	B	B	B	A	A	A	A	A	A	A	A	B	B	B	B	B	B	B	A	-	-
K73	B	B	B	B	B	A	A	A	A	A	B	B	B	B	B	B	A	A	A	A	B	A	A	A	A	A	A	-	-	-	-	B	B	B	B	B	B	B	B	A	A	A	A	A	A	A	A	A	A
K74	B	B	A	A	A	A	A	B	A	A	A	A	A	A	A	A	A	A	A	A	B	B	B	A	A	A	A	A	A	A	A	A	A	A	A	A	A	A	B	B	A	A	A	A	A	A	A	A	A
K75	B	B	A	A	A	A	A	A	A	A	A	B	B	B	B	A	A	A	A	A	A	B	B	A	A	A	A	A	A	A	A	A	A	A	B	B	B	B	B	B	B	B	B	B	A	A	B	-	A
K76	A	A	A	A	A	A	A	A	A	A	A	A	B	A	A	-	A	A	A	A	A	A	A	B	B	B	B	B	B	B	B	B	B	B	B	B	B	B	B	A	A	A	A	B	B	A	A	A	A
K77	A	A	A	A	A	A	A	A	A	A	A	A	B	B	B	B	B	B	A	A	A	A	A	B	B	B	B	A	A	A	A	A	B	B	B	B	B	B	B	B	B	B	B	B	B	A	A	A	A
K78	B	B	B	B	B	A	A	A	A	A	A	A	B	B	B	B	B	B	B	B	B	B	A	B	B	B	B	B	B	B	B	B	B	B	B	B	B	B	B	B	B	B	B	B	-	-	-	B	B
K79	-	A	A	A	A	A	B	A	A	A	A	B	A	A	A	A	A	A	A	A	A	B	A	A	A	B	B	B	B	B	B	B	B	B	B	B	A	B	B	A	A	A	A	A	A	B	A	A	A
K80	B	A	A	B	B	B	A	B	B	B	-	B	B	B	B	A	A	A	A	A	A	A	A	A	B	B	B	B	B	B	B	B	B	A	B	B	B	B	A	B	A	A	A	A	A	A	A	B	B
K81	B	A	A	A	A	A	A	B	B	B	B	B	A	A	A	A	B	A	A	B	B	B	B	B	B	B	B	B	B	B	B	B	B	B	B	B	B	B	B	A	A	A	A	A	A	A	A	B	B
K82	B	B	B	B	B	B	A	A	A	A	A	B	B	A	A	A	A	A	A	A	B	B	B	A	A	A	A	A	A	A	A	A	B	B	B	B	B	B	B	B	B	A	A	A	A	A	A	A	A
K83	A	A	A	A	A	B	B	B	B	B	B	A	A	A	A	A	B	B	B	B	B	B	A	B	B	B	B	B	B	B	B	B	B	B	B	B	B	A	A	A	A	A	A	A	A	A	A	A	A
K84	A	A	A	A	A	A	A	A	A	A	A	A	A	A	A	A	A	A	A	A	A	A	A	B	B	B	B	B	B	B	B	B	B	B	B	A	A	A	B	B	B	B	B	-	-	A	A	A	A
K85	A	A	A	A	A	A	A	A	A	B	-	B	B	B	B	B	B	B	B	B	A	A	A	B	B	B	-	A	A	A	A	A	A	A	A	A	A	A	A	A	A	A	A	A	A	A	A	B	B
K86	A	-	A	A	A	A	B	B	B	B	B	A	B	B	B	B	B	B	A	A	A	A	B	A	A	A	A	A	A	A	A	A	B	B	B	B	B	B	B	A	A	A	A	A	A	A	A	B	B
K87	B	-	B	B	B	B	B	B	B	B	B	B	B	A	A	A	A	B	B	B	B	B	A	B	A	B	B	B	B	B	B	B	B	B	A	A	B	B	B	A	A	A	A	A	A	A	A	A	B
K88	A	A	A	A	A	A	A	B	A	B	B	B	A	A	A	A	A	A	A	A	A	A	B	B	A	A	A	A	A	A	A	A	A	B	A	A	A	A	A	A	A	A	A	A	A	A	A	B	A
K89	B	B	B	B	B	B	A	A	A	A	A	A	A	A	A	A	A	A	A	A	A	A	A	A	B	B	B	B	B	B	B	B	B	B	A	A	A	A	A	A	A	A	A	A	A	A	A	A	B
K90	A	A	A	A	A	A	A	A	A	B	B	B	B	B	B	B	B	B	B	B	A	A	B	A	B	A	A	A	A	A	A	A	A	B	A	A	B	B	B	A	A	A	A	A	A	A	A	B	A
K91	B	B	A	A	A	A	A	B	B	A	A	A	B	B	B	B	B	A	A	A	A	A	A	A	A	A	A	A	A	A	A	B	B	B	B	B	A	A	A	B	B	B	B	A	A	A	A	A	A
K92	A	B	B	B	B	A	A	A	A	B	B	B	B	A	A	A	A	B	B	B	B	B	A	B	B	A	A	A	A	A	A	A	A	A	A	B	B	B	B	B	B	B	A	A	B	A	A	A	A
K93	B	B	B	B	B	B	B	A	A	A	A	-	B	B	B	A	A	A	A	A	A	B	A	A	A	A	A	B	A	A	A	A	A	A	A	B	B	B	B	A	A	A	A	A	A	A	A	A	A
K94	B	A	-	-	A	A	-	B	B	B	B	B	A	A	A	B	B	A	A	A	A	A	A	A	A	A	A	A	A	A	A	A	A	A	A	A	A	A	A	A	A	A	A	A	A	A	A	A	B
K95	B	B	B	B	B	A	A	A	A	A	A	A	-	A	A	A	-	B	B	B	B	B	-	A	B	B	B	B	B	B	B	B	A	A	A	A	A	A	A	-	B	A	A	A	A	A	A	A	A
K96	A	A	A	A	A	A	A	B	B	B	B	A	A	B	B	B	B	B	B	B	B	B	B	B	B	B	B	B	B	B	B	B	B	B	B	B	B	B	A	A	A	B	B	B	A	A	B	B	B
K97	B	B	B	B	B	B	B	B	B	B	B	B	B	B	B	A	A	B	B	B	A	A	B	A	A	A	A	A	A	A	A	B	A	A	B	B	B	B	A	A	A	A	A	A	A	A	A	A	B
K98	A	A	A	A	A	A	A	A	A	B	A	-	A	A	A	A	A	A	B	B	B	B	B	B	A	A	A	A	A	A	A	A	A	B	B	B	B	-	A	A	A	A	A	A	A	A	-	B	B
K99	B	B	B	B	B	A	A	A	A	A	A	A	B	A	A	A	A	A	A	A	A	A	B	B	B	B	B	B	B	B	B	B	B	B	B	B	B	B	A	B	B	B	B	B	A	A	A	A	A
K100	A	A	A	A	A	A	A	A	A	A	A	B	B	B	B	B	B	B	B	B	B	B	A	A	A	A	A	B	B	B	B	B	B	B	B	B	B	B	B	A	A	A	A	B	A	A	A	A	A
K101	A	A	A	A	A	A	A	A	A	A	A	A	A	A	A	A	A	A	A	A	A	A	A	A	A	A	A	A	A	A	A	A	A	A	A	A	A	A	A	A	A	A	A	A	A	A	A	A	A
K102	A	B	B	B	B	B	A	A	A	A	A	A	A	B	B	B	A	B	B	B	B	B	B	B	B	B	B	B	B	B	A	A	A	B	B	B	A	A	A	A	A	A	B	B	B	A	A	A	A
K103	B	B	B	B	B	B	A	B	B	B	B	B	B	B	B	B	B	A	A	A	A	A	B	B	A	A	A	B	B	B	B	B	B	A	A	B	B	B	B	B	B	B	B	B	-	A	A	B	B
K104	A	A	A	A	A	A	A	A	A	B	B	B	B	B	B	B	B	B	B	B	B	B	B	A	A	A	A	A	A	A	A	A	A	A	A	A	A	A	A	A	A	A	A	A	A	A	A	A	A
K105	A	A	B	B	B	B	A	A	A	A	A	A	B	B	B	B	B	B	B	B	B	B	B	B	B	A	A	A	A	A	A	A	A	A	A	A	A	A	A	B	B	A	A	A	A	A	A	A	A
K106	B	B	B	B	B	B	B	A	A	A	A	B	B	B	B	B	-	-	-	-	-	-	B	B	B	B	B	A	A	A	A	B	B	B	B	B	B	B	B	A	A	A	A	A	A	A	A	A	A
K107	A	B	B	B	B	A	A	A	A	B	B	B	B	A	A	A	A	B	B	B	B	B	A	B	-	A	A	A	A	A	A	A	A	A	A	B	A	A	A	B	B	B	A	A	B	A	A	A	A
K108	B	-	-	B	B	B	B	-	A	A	A	A	A	A	A	A	A	A	A	A	A	A	B	A	A	A	A	A	A	A	A	A	A	A	B	-	B	A	A	B	B	B	B	B	A	A	A	A	A
K109	B	B	B	B	B	B	A	B	B	B	A	A	A	A	A	A	A	A	A	A	B	B	A	B	B	B	B	A	A	A	A	A	A	B	A	A	A	A	A	A	A	A	A	A	A	A	A	A	A
K110	-	-	A	A	A	A	A	A	A	A	A	A	A	A	A	A	A	A	A	A	A	A	B	B	A	A	A	A	A	A	A	A	A	A	A	B	B	B	B	A	A	A	A	A	A	A	A	A	A
K111	A	A	A	A	A	A	A	A	A	A	A	A	A	A	-	B	B	B	B	B	A	A	B	B	A	A	A	A	A	A	A	A	A	A	A	A	A	A	A	B	B	B	B	B	B	A	A	A	A
K112	B	A	A	A	A	A	A	B	A	A	A	A	A	A	A	A	A	B	B	B	B	B	B	B	B	B	B	B	B	B	B	B	B	B	B	B	B	B	B	A	A	A	A	-	A	A	A	A	A
K113	B	B	A	A	A	A	B	B	B	B	B	A	A	A	A	A	A	B	B	B	B	B	-	A	A	A	A	A	A	A	A	A	A	A	A	A	A	B	-	B	B	B	B	B	B	B	B	A	A
K114	A	A	A	A	A	A	A	A	A	A	B	B	A	A	A	A	B	B	B	B	B	B	A	A	A	A	A	A	A	A	A	A	A	A	A	A	A	A	A	A	A	A	A	A	A	A	A	A	A
K115	A	A	A	A	A	A	A	B	B	B	B	A	A	A	A	A	A	A	A	A	A	B	B	A	B	B	B	B	A	B	B	B	B	B	B	B	B	B	B	A	A	A	A	B	B	B	B	A	A
K116	B	B	B	B	B	A	A	A	A	A	A	A	B	A	A	A	B	A	A	A	A	A	B	B	B	B	B	B	A	B	B	B	B	A	B	A	A	A	A	A	A	A	A	A	A	A	A	A	A
K117	B	A	A	A	A	A	A	A	A	A	A	A	B	B	B	A	A	A	A	A	B	B	B	B	B	B	B	B	B	-	B	B	B	B	B	B	B	B	B	B	B	A	A	A	A	A	A	A	A
K118	B	A	A	A	A	A	A	A	A	B	B	B	A	A	A	A	A	A	B	B	B	B	A	B	B	B	B	B	A	A	B	B	B	B	B	A	B	B	B	A	B	B	B	B	B	A	A	A	A
K119	A	A	A	A	A	A	A	A	A	A	A	A	A	A	A	A	A	A	A	A	B	B	A	A	A	A	A	A	B	B	A	A	A	A	A	A	A	A	A	B	B	B	B	B	B	A	A	A	A
K120	B	B	B	B	B	A	A	A	A	A	A	A	A	A	A	A	A	A	A	A	B	B	A	A	A	B	B	A	-	-	-	-	A	A	B	B	B	B	B	A	A	A	A	A	A	A	A	A	B
K121	B	B	B	A	A	A	A	A	A	A	A	A	A	A	A	A	A	A	A	A	A	A	B	B	B	B	B	B	B	B	B	B	B	B	B	B	B	B	B	A	A	A	A	A	A	A	A	A	A
K122	B	B	B	B	B	A	A	A	A	A	A	A	A	A	A	B	B	B	B	B	B	B	B	A	A	A	A	A	A	A	A	A	A	B	A	A	A	-	A	A	A	A	A	A	A	A	A	A	A
K123	B	B	B	B	B	B	B	B	B	B	B	B	A	B	B	B	B	A	A	A	A	A	B	B	B	B	B	B	B	B	B	B	B	B	B	B	B	B	-	A	A	A	A	A	A	A	A	A	A
K124	A	A	A	A	A	A	A	A	A	A	A	A	B	B	B	B	B	B	A	A	B	B	B	B	B	A	A	A	A	A	A	A	A	A	B	B	B	B	A	A	A	A	A	A	A	A	B	A	B
K125	A	B	B	B	B	B	B	B	B	B	-	B	B	B	B	B	B	B	B	B	B	B	-	A	B	B	B	B	B	B	B	B	B	A	B	B	B	B	A	A	A	A	A	A	A	A	A	A	B
K126	B	-	A	A	A	A	A	B	B	B	B	B	A	B	B	B	B	B	B	A	A	A	A	A	B	B	A	B	B	B	B	B	B	A	B	B	B	B	B	A	A	A	A	A	A	A	A	A	A
K127	B	B	B	B	B	B	B	B	B	B	B	B	A	B	B	B	B	B	B	B	B	A	B	B	B	B	B	B	B	B	B	A	A	A	A	A	B	B	B	B	B	B	B	B	A	A	A	A	B
K128	A	A	B	B	B	A	A	A	A	A	A	A	A	A	A	A	A	A	A	A	B	B	A	A	A	A	A	B	B	B	B	B	B	B	B	A	A	B	B	A	A	A	A	A	A	A	A	A	A
K129	A	A	A	A	A	A	A	A	A	A	A	A	B	B	B	B	B	B	B	B	B	A	B	B	B	B	B	B	B	B	B	B	B	B	B	B	B	A	A	A	A	A	A	A	A	A	A	A	A
K130	A	A	A	A	A	A	A	-	B	B	B	A	A	A	A	A	A	A	A	A	A	A	B	B	B	A	B	A	A	A	A	A	A	A	A	A	A	B	B	B	B	B	B	B	A	A	B	A	A
K131	A	A	A	A	A	A	A	A	A	A	B	B	B	B	B	B	B	B	B	B	A	A	A	B	B	B	B	A	A	A	A	A	B	B	B	B	B	B	B	B	B	B	B	B	A	A	B	A	A
K132	B	B	A	A	A	A	A	A	A	A	A	A	A	A	A	-	-	-	-	B	A	-	B	B	B	A	A	A	A	A	B	B	A	A	A	A	A	A	A	B	B	B	B	B	B	B	B	B	B
K133	A	A	A	A	A	A	A	B	B	B	B	B	B	B	B	B	B	B	B	B	-	-	A	A	A	A	A	A	A	A	A	B	B	B	B	B	B	B	B	B	B	B	B	B	B	B	B	A	-
K134	B	B	B	B	B	A	B	B	B	A	A	A	B	B	B	B	B	B	B	B	B	A	A	B	B	B	B	A	A	A	A	A	B	B	A	A	A	A	A	A	A	A	A	A	A	A	A	A	A
K135	B	B	B	B	B	B	B	B	B	B	B	B	A	A	A	A	A	A	A	A	A	A	B	A	A	A	A	A	A	A	A	A	A	A	B	B	B	B	B	A	A	B	B	B	B	B	B	B	B
K136	A	A	A	A	A	A	A	A	A	A	A	A	A	A	A	A	A	B	B	B	B	B	B	B	B	B	B	B	A	A	A	A	A	B	B	B	B	B	B	A	A	A	A	A	A	A	A	B	B
K137	A	A	A	A	A	A	A	A	A	A	A	A	A	A	A	A	A	A	A	A	B	B	A	A	A	A	A	A	B	B	A	A	A	A	A	A	A	A	A	B	B	B	B	B	B	A	A	A	A
K138	A	A	A	A	A	A	A	B	B	B	B	A	B	B	B	B	B	B	B	B	A	A	B	B	B	B	B	B	B	B	B	B	B	B	A	A	A	A	A	B	B	B	B	B	B	B	A	B	A
K139	A	A	B	B	B	A	A	A	A	A	A	A	A	A	A	A	A	A	A	A	-	-	A	A	A	A	A	B	B	B	B	B	B	B	B	-	A	B	B	A	A	A	A	A	A	A	A	A	A
K140	B	B	A	B	B	B	B	B	B	B	B	B	B	A	A	A	B	B	B	B	A	A	B	B	B	A	A	A	A	A	A	A	A	A	A	A	A	A	A	B	B	B	B	B	B	B	A	A	B
K141	A	A	A	A	A	A	A	-	A	A	A	A	B	A	A	A	A	B	B	B	B	B	B	B	B	B	B	A	A	A	A	A	A	B	B	B	B	A	A	A	A	A	A	B	A	A	A	A	A
K142	A	A	A	A	A	A	A	A	A	A	A	A	A	A	A	A	A	B	B	B	B	B	B	A	A	A	A	A	A	A	A	A	A	B	B	B	B	B	B	A	A	A	A	B	A	A	A	B	B
K143	-	-	A	-	A	A	A	-	-	-	A	B	-	B	B	B	B	B	B	-	-	-	A	A	-	B	B	B	B	B	-	-	B	A	A	-	B	-	-	A	A	A	B	A	A	A	A	A	A
K144	B	B	B	B	B	B	B	B	B	B	B	B	B	B	B	B	B	B	B	B	B	B	B	B	B	A	A	A	B	A	A	A	A	A	A	A	A	A	A	B	B	B	B	B	B	A	A	A	A
K145	A	A	A	A	A	A	A	A	A	A	A	A	B	B	B	B	B	B	B	B	B	B	A	A	B	B	B	B	B	B	B	B	A	B	A	A	B	B	B	A	A	A	A	B	B	A	A	A	A
K146	B	B	B	B	B	A	A	A	A	A	A	A	A	A	A	A	A	B	B	B	B	A	B	B	-	-	-	B	B	A	A	A	A	A	B	B	A	A	A	A	A	A	A	A	A	A	A	B	A
K147	B	B	B	B	B	B	A	A	A	A	A	-	A	A	A	B	B	B	B	B	A	B	A	B	-	-	A	A	A	A	A	A	A	B	B	B	B	B	B	A	A	A	A	A	A	A	B	A	A
K148	B	B	B	B	B	B	A	A	A	A	A	A	A	A	A	A	A	A	A	A	A	B	B	B	B	B	B	B	B	B	B	B	B	B	B	B	B	B	A	B	B	B	B	B	A	A	A	A	-
K149	B	B	A	A	A	A	A	A	A	A	-	B	B	B	B	B	B	B	B	B	A	A	B	B	B	B	B	B	B	B	B	B	A	A	B	A	-	-	B	-	B	B	B	B	A	A	A	A	A
K150	A	A	B	B	B	A	A	B	B	B	B	A	B	B	B	B	B	B	B	B	B	B	B	B	B	B	B	B	B	B	B	B	B	B	B	B	B	B	B	A	A	A	A	A	B	A	A	A	A
K151	A	A	A	A	A	B	B	B	B	B	B	B	B	B	B	A	A	-	A	A	A	A	B	B	B	B	B	A	A	-	A	A	A	A	A	A	A	A	A	A	A	B	B	B	A	A	A	A	A
K152	A	A	B	B	B	B	A	A	A	A	A	A	A	A	A	A	A	A	A	A	B	B	B	B	B	A	A	A	A	A	A	A	A	B	A	A	A	A	A	A	A	A	A	A	A	A	A	A	B
K153	A	A	A	A	A	A	A	B	B	A	A	B	B	B	B	A	A	A	B	B	B	B	B	B	B	B	B	B	B	B	B	B	B	B	B	B	B	B	B	B	B	B	B	A	A	A	A	A	A
K154	A	A	A	A	A	A	A	A	B	B	B	A	A	A	A	A	A	A	A	A	A	B	B	A	A	A	A	B	B	B	B	A	A	A	A	A	A	A	A	B	B	B	B	B	B	B	A	A	A
K155	A	B	B	B	B	B	B	B	B	B	B	B	B	B	B	A	A	A	A	A	A	A	B	A	A	A	A	A	A	A	A	A	A	A	A	A	A	A	A	B	B	B	B	B	B	B	B	B	A
K156	B	A	A	A	A	B	B	A	A	A	A	B	B	B	B	A	A	A	A	A	A	A	A	A	A	A	A	B	A	B	B	B	B	B	A	A	-	B	B	A	B	B	B	B	B	A	A	A	B
K157	A	A	-	A	-	A	A	A	A	B	B	A	B	B	B	B	B	B	B	B	B	B	A	A	A	A	A	A	-	A	A	B	B	A	A	B	B	B	B	A	A	A	A	A	A	A	A	A	A
K158	A	A	B	B	B	B	B	A	A	A	A	A	A	A	A	A	A	A	A	A	B	B	B	A	B	B	B	B	-	B	B	A	A	A	A	A	A	A	A	A	A	A	A	A	A	A	A	A	B
K159	B	B	B	B	B	B	B	A	A	A	A	A	B	B	B	B	B	B	B	B	B	B	A	B	B	B	B	B	-	B	B	B	B	B	B	B	B	B	A	A	A	A	A	A	A	A	A	A	B
K160	A	A	A	A	A	A	A	A	B	B	B	A	A	A	A	A	A	B	A	A	A	A	A	A	A	A	A	A	B	A	A	A	A	B	B	B	B	B	B	B	B	B	B	B	A	A	A	A	A
K161	B	B	B	B	B	A	A	-	B	A	A	A	A	B	B	B	B	B	B	B	A	A	A	A	A	A	A	B	B	B	B	B	B	B	B	A	A	B	B	A	A	A	A	A	A	A	B	B	B
K162	A	A	A	A	A	A	A	A	-	-	-	A	B	B	A	A	B	B	B	B	B	A	B	B	B	B	B	B	B	B	B	B	B	A	-	-	-	B	B	B	B	B	B	B	A	A	A	-	-
K163	A	A	A	A	A	A	A	A	A	A	A	A	A	A	A	A	A	A	A	A	B	A	B	A	A	A	A	A	A	A	A	A	-	-	B	B	-	A	B	A	A	A	A	A	A	A	A	A	A
K164	B	B	B	B	B	A	A	B	B	B	B	B	B	B	B	B	B	B	B	B	B	B	B	A	A	A	A	B	B	B	B	B	B	A	A	A	B	A	A	A	A	A	A	A	A	A	A	A	B
K165	B	B	B	B	B	A	A	A	A	A	A	A	A	A	A	B	B	-	-	B	B	B	A	A	A	A	A	B	B	B	B	B	B	B	B	B	B	B	B	A	A	A	A	A	A	A	A	A	A
K166	A	A	A	A	A	A	A	-	B	B	-	B	B	B	B	B	B	A	A	A	A	A	A	B	B	A	-	A	B	B	B	B	B	B	A	A	A	A	A	A	A	A	A	A	A	A	A	A	B
K167	B	A	B	B	B	A	A	A	A	A	A	A	A	A	A	A	A	A	A	A	A	A	B	A	B	B	B	B	B	B	B	A	A	B	B	A	A	A	B	B	B	B	B	B	-	A	A	A	A
K168	B	B	A	A	A	A	A	A	A	A	A	A	A	B	B	B	-	B	B	B	A	B	B	B	B	B	B	B	B	B	B	B	B	A	A	A	A	A	A	B	B	B	B	B	B	A	A	A	A
K169	A	A	A	A	A	A	B	A	A	A	A	A	A	A	A	A	A	B	A	A	A	A	B	A	A	A	B	B	B	B	B	B	B	B	B	A	A	A	A	A	A	A	A	A	A	A	A	A	A
K170	B	B	A	A	A	A	A	-	B	-	A	A	B	A	A	A	A	A	A	B	B	B	-	A	B	B	B	B	B	B	B	B	B	B	A	A	A	B	B	A	A	A	A	A	A	A	A	A	A
K171	B	B	B	B	B	B	A	A	A	A	A	B	B	B	B	B	B	A	A	A	A	B	A	A	-	-	-	B	B	B	B	B	B	-	A	A	A	A	A	A	A	A	A	A	A	B	B	B	B
K172	A	B	B	B	B	B	B	B	B	B	B	B	B	B	B	B	B	B	B	B	B	-	B	B	B	A	A	A	A	A	A	A	B	B	B	B	B	B	B	B	B	B	B	B	A	A	A	A	B
K173	A	A	A	A	A	A	A	A	A	A	A	A	A	A	A	B	B	B	B	B	A	A	B	B	B	B	B	B	B	B	B	B	B	B	B	B	B	B	B	B	B	B	B	B	B	A	A	A	A
K174	A	A	A	A	B	B	-	B	B	B	B	B	B	B	B	B	B	B	B	B	-	-	A	A	A	A	A	A	A	B	A	-	-	B	B	B	B	B	B	B	B	-	B	-	B	B	B	-	B
K175	B	A	B	B	B	A	A	A	B	B	B	B	B	B	B	A	B	B	B	B	B	B	A	A	B	B	B	B	A	B	B	A	B	B	A	A	A	A	A	B	B	B	B	B	A	A	A	A	A
K176	A	A	A	A	B	B	B	B	B	B	B	B	B	B	B	B	B	B	B	B	A	A	A	A	A	A	A	-	A	-	A	-	B	B	B	B	B	B	B	B	B	B	B	B	B	B	B	A	B
K177	B	B	B	B	B	B	A	B	B	B	B	A	A	A	A	A	A	B	B	B	B	B	A	A	B	B	B	B	B	B	B	A	A	A	A	A	A	A	A	B	B	B	B	B	B	B	B	B	A
K178	A	A	A	A	A	A	A	A	A	B	B	B	B	A	A	A	B	B	B	B	B	B	A	A	A	A	A	A	A	A	A	A	A	A	A	A	A	A	A	B	B	-	B	-	-	-	B	B	B
K179	B	B	B	B	B	B	A	A	A	A	A	B	B	B	B	A	A	B	B	B	B	B	B	B	B	B	B	-	A	A	A	B	B	A	A	B	B	B	B	B	B	B	B	B	A	A	A	A	A
K180	A	A	A	A	A	B	B	B	B	B	B	B	B	B	B	B	B	B	B	B	B	B	A	A	A	B	B	B	B	B	B	B	B	B	B	B	B	B	B	A	A	A	A	A	A	A	A	A	A
K181	B	B	B	B	B	B	A	A	A	A	B	B	B	B	B	B	B	A	A	A	A	A	B	B	B	A	A	A	A	A	A	A	A	A	A	A	A	A	A	B	B	B	B	A	A	A	A	B	B
K182	A	A	A	A	A	A	A	B	B	B	B	A	A	A	A	A	A	B	B	B	B	B	B	A	A	A	A	B	B	B	B	B	B	B	B	B	A	A	A	B	A	A	A	A	A	A	A	A	A
K183	A	A	A	A	A	A	A	A	A	A	A	A	A	A	A	A	A	A	A	A	B	B	A	A	A	A	A	B	B	B	B	B	B	B	B	-	A	B	B	A	A	A	A	A	A	A	A	A	A
K184	B	B	B	B	B	B	B	A	A	A	A	A	B	B	B	B	B	B	B	B	A	A	B	A	A	A	A	A	A	A	A	A	A	A	A	A	A	A	A	B	B	B	B	B	A	A	A	A	A
K185	B	B	B	B	B	A	A	A	A	A	A	A	B	B	B	A	A	-	-	B	A	B	A	A	A	B	B	B	B	B	B	B	B	B	B	B	B	B	A	A	A	A	A	A	A	A	A	B	B
K186	A	A	A	A	A	A	A	A	B	B	B	B	-	-	-	A	A	A	A	A	B	B	B	B	B	B	B	B	B	B	B	B	B	B	B	B	B	B	B	B	B	A	A	A	A	A	A	A	A
K187	B	A	A	B	B	B	B	B	B	B	B	B	B	B	B	B	B	B	A	A	A	A	A	B	A	B	-	-	-	-	-	B	B	A	A	A	A	A	B	A	A	A	A	A	A	A	A	A	A
K188	B	B	A	-	A	A	A	A	A	A	A	B	B	B	B	B	B	B	B	B	A	A	B	B	A	A	A	A	B	B	B	B	A	A	A	B	B	A	A	B	B	B	B	B	A	A	A	A	A
K189	A	B	A	B	A	B	B	B	A	A	A	B	B	B	B	B	A	B	B	B	A	A	B	B	B	B	B	A	A	A	A	A	A	A	A	-	B	B	B	A	A	A	A	A	A	A	A	A	A
K190	A	A	A	A	A	A	A	B	B	B	B	B	B	B	B	B	B	B	B	B	B	B	B	B	B	B	B	B	A	-	B	B	B	A	A	A	A	A	A	B	B	A	B	A	A	A	A	A	B
K191	B	A	A	A	A	A	A	A	B	B	B	-	B	B	B	A	A	A	A	A	B	B	B	B	B	B	B	B	A	B	B	B	B	B	B	B	B	B	B	B	B	A	A	A	A	A	A	A	A
K192	-	-	A	A	A	A	A	B	B	B	B	-	A	A	A	A	-	-	-	-	-	-	-	A	-	A	-	B	B	A	-	-	-	-	-	B	B	B	A	-	A	A	A	A	-	A	A	A	-
K193	A	A	-	-	-	A	A	A	A	A	A	A	B	B	B	B	B	B	B	B	A	A	A	B	A	A	A	A	B	A	A	B	B	B	B	B	B	B	B	A	A	A	A	A	A	A	A	A	A
K194	A	A	A	A	A	A	A	A	A	A	A	A	B	A	A	B	B	B	B	B	B	A	B	A	A	A	A	A	B	A	A	A	A	A	A	A	A	A	A	A	A	A	A	A	A	A	A	A	B
K195	A	A	A	A	A	B	B	B	B	A	A	A	A	A	A	B	B	B	B	B	B	B	B	A	A	A	A	A	B	A	A	A	A	B	B	B	B	B	B	B	A	A	A	A	A	A	A	B	B
K196	A	A	B	A	A	A	A	A	A	A	A	A	B	B	B	B	B	B	B	B	B	B	A	A	A	A	A	A	B	A	A	A	A	A	B	B	B	B	B	B	B	B	B	B	B	A	A	A	A
K197	A	A	A	A	A	A	A	A	A	A	A	-	A	A	A	A	A	A	A	A	A	A	B	B	A	A	-	B	A	B	B	B	B	A	B	B	B	A	A	A	A	A	A	A	A	A	A	A	A
K198	B	B	B	B	B	A	A	B	B	B	B	A	B	B	B	B	B	B	B	B	B	B	A	A	B	B	B	B	A	B	B	B	B	B	B	B	B	B	B	B	B	B	B	B	B	A	B	A	B
K199	B	B	B	B	B	B	B	B	B	B	B	A	B	B	B	B	B	B	B	B	B	B	A	A	A	A	B	B	A	B	A	A	A	A	A	A	A	A	A	A	A	A	B	B	A	A	A	B	B
K200	B	B	B	B	B	B	A	A	A	A	A	A	A	B	B	B	B	B	B	B	B	B	A	A	A	A	A	A	B	A	A	A	A	A	A	A	A	A	A	B	B	B	B	B	A	A	A	A	A
K201	B	B	B	B	B	B	B	B	B	B	B	B	B	B	B	B	B	B	B	B	B	B	B	B	B	B	B	B	B	B	B	B	B	B	B	B	B	B	B	B	B	B	B	B	B	B	B	B	B
K202	A	A	A	A	A	A	B	B	B	B	B	B	B	B	B	B	B	B	B	B	B	B	A	A	A	A	A	A	B	A	A	B	B	B	B	B	B	B	B	B	B	B	B	B	B	B	B	A	A
K203	B	B	B	B	B	B	B	A	A	A	A	A	B	B	B	B	B	B	B	B	B	B	A	A	B	A	A	A	B	A	A	A	A	B	B	B	A	A	A	B	B	B	B	B	A	A	A	B	-
K204	A	B	B	B	B	A	A	B	A	A	A	B	B	B	B	B	B	B	B	B	B	B	B	B	A	A	A	-	B	A	A	A	A	A	B	A	A	A	A	B	B	B	B	B	B	A	A	A	B
K205	B	B	B	B	B	-	-	B	B	B	B	B	B	B	B	B	B	B	B	B	B	B	B	A	B	B	B	-	-	-	-	-	-	B	B	B	B	B	B	A	A	A	A	A	A	A	-	A	B
K206	A	A	A	A	A	A	A	B	B	B	B	B	B	A	A	A	A	B	B	B	B	B	B	A	A	A	A	A	A	A	A	A	B	B	A	A	A	A	A	A	A	A	A	A	A	A	A	A	A
K207	A	A	A	B	B	B	A	A	A	A	A	A	A	A	A	A	A	A	A	A	A	A	B	B	B	A	A	A	A	A	A	A	A	A	A	A	B	B	B	A	A	A	B	B	A	A	A	A	A
K208	B	B	B	B	B	A	A	A	A	A	A	A	A	A	A	A	A	A	A	A	A	A	B	A	A	A	A	A	A	A	A	A	A	A	A	A	A	A	A	A	A	A	A	A	A	A	A	A	A
K209	B	B	B	B	B	B	B	B	B	A	A	A	B	B	B	B	B	B	B	B	B	A	B	B	B	B	B	B	B	B	B	B	B	B	B	B	B	B	B	A	A	A	A	A	A	A	A	A	A
K210	B	-	-	-	-	-	A	-	-	-	-	-	B	A	A	A	A	A	B	B	A	A	B	B	B	B	B	A	A	A	A	A	A	A	A	A	A	A	A	A	A	A	A	A	A	A	A	A	A
K211	A	A	A	A	A	A	A	A	A	A	-	-	B	B	-	-	-	-	-	A	A	A	B	B	A	A	A	A	A	A	A	-	-	B	B	B	B	B	B	A	A	A	A	B	-	A	-	-	-
K212	A	A	A	A	A	A	A	A	A	B	B	B	B	B	B	B	B	B	B	B	B	B	B	A	A	A	A	B	B	B	B	A	A	A	A	A	A	A	A	B	B	B	B	B	B	A	A	B	B
K213	A	A	A	A	A	A	A	A	A	A	A	B	B	B	A	A	A	A	A	A	A	A	A	B	B	B	B	B	B	B	B	B	B	A	A	A	A	-	A	B	B	B	B	B	B	B	A	A	A
K214	A	A	A	A	A	A	A	A	A	B	B	B	B	B	B	A	A	A	A	A	B	B	A	A	A	A	A	A	B	B	B	-	-	B	B	A	A	B	B	A	A	A	A	A	A	A	A	A	A
K215	B	B	-	-	-	A	A	B	B	B	B	B	B	B	B	B	B	A	A	A	A	A	A	A	A	A	A	A	A	A	A	A	B	B	B	B	B	B	A	A	A	A	A	B	A	A	A	A	A
K216	A	A	A	A	A	A	A	A	A	A	A	A	A	A	A	A	A	A	A	A	A	A	A	A	A	A	A	A	A	A	A	A	A	A	A	A	A	A	B	B	B	A	A	A	A	A	A	A	B
K217	-	-	-	-	-	A	A	A	A	A	A	B	A	A	A	A	A	A	A	A	A	A	B	B	A	A	A	A	A	A	A	A	B	B	B	B	B	B	B	A	A	A	A	B	B	A	A	B	B
K218	A	A	A	A	A	A	A	B	B	B	B	B	B	A	A	A	B	B	B	B	B	B	A	A	B	B	B	B	B	B	B	B	B	B	B	B	B	A	A	B	A	A	A	A	A	A	B	A	A
K219	B	B	B	B	B	B	B	B	B	B	B	A	A	A	A	B	B	B	B	B	B	B	B	-	B	B	B	B	B	B	B	B	B	A	A	B	B	B	B	B	B	B	B	B	B	A	A	A	B
K220	B	B	B	B	B	A	A	A	A	A	A	A	B	B	B	A	A	A	A	A	A	A	B	B	B	B	B	B	B	B	B	B	B	B	B	B	B	B	A	B	B	B	B	B	A	A	A	A	A
K221	A	A	A	A	A	B	B	B	B	B	B	B	B	B	B	B	B	B	B	B	B	B	B	B	B	B	B	B	B	B	B	B	B	B	B	A	B	B	B	A	A	A	A	A	A	A	A	A	B
K222	B	B	B	B	B	A	A	A	A	A	A	A	-	B	B	A	A	B	B	B	A	B	A	A	A	B	B	B	B	B	B	B	B	B	B	B	B	-	A	A	A	A	A	A	A	A	A	B	B
K223	-	-	A	A	A	A	B	B	-	-	-	-	-	A	A	-	-	-	B	B	B	-	-	-	-	-	-	-	-	-	B	B	B	-	-	-	-	-	-	B	B	B	B	B	B	B	B	-	-
K224	B	B	B	B	B	B	-	A	A	A	A	A	A	B	B	B	B	B	B	B	B	B	A	A	A	A	A	A	B	A	A	B	B	B	B	B	B	B	B	B	B	A	A	A	A	A	A	A	A
K225	A	A	A	A	A	A	A	A	A	A	A	A	A	A	A	A	A	A	A	A	A	A	A	A	B	B	B	B	B	B	B	B	B	B	B	A	A	A	A	A	A	A	A	A	A	A	A	A	B
K226	B	B	B	B	B	B	B	A	A	A	A	A	B	B	A	B	B	-	A	A	B	B	A	A	A	A	A	A	A	A	A	B	B	B	B	B	B	B	B	A	A	A	B	B	B	B	A	A	A
K227	B	B	A	A	A	A	A	A	A	A	A	A	B	B	B	B	B	A	A	A	A	A	A	A	A	A	A	A	A	A	A	B	B	A	A	A	A	A	A	B	B	B	B	A	A	A	A	A	A
K228	B	A	A	A	A	A	A	A	A	A	A	B	B	A	A	A	A	A	A	A	A	B	B	B	B	B	B	B	B	B	B	B	B	B	B	A	A	B	B	B	B	B	B	A	B	-	-	B	B
K229	B	A	A	A	A	A	A	A	B	B	B	B	B	A	A	A	A	A	A	A	A	B	B	A	A	A	A	A	A	A	A	A	A	A	A	A	B	B	B	B	B	B	B	B	B	B	B	A	A
K230	B	B	B	B	B	B	B	B	B	B	B	B	-	B	B	B	B	B	B	B	B	B	A	B	B	B	B	B	B	B	B	B	B	B	B	A	A	A	A	A	A	A	A	A	A	A	A	A	A
K231	A	A	A	A	A	B	B	B	B	B	B	A	A	A	A	B	B	A	A	A	B	B	A	B	B	A	A	A	B	B	B	B	B	B	B	B	B	B	B	A	A	A	A	A	A	A	A	A	A
K232	B	B	B	B	B	B	B	B	B	B	B	B	B	A	A	B	B	B	B	B	B	B	B	A	B	A	A	A	A	A	A	A	A	A	B	B	B	B	B	A	A	A	A	A	A	A	A	A	A
K233	A	B	B	B	B	B	B	B	B	B	B	A	A	A	B	B	B	B	B	A	A	A	A	A	A	A	A	B	B	B	B	B	B	A	A	A	A	A	A	A	A	A	A	A	A	A	A	A	B
K234	B	B	B	B	B	B	B	B	B	B	B	B	A	B	B	B	B	B	B	B	B	B	B	B	B	B	B	B	B	B	B	B	B	B	B	B	B	A	A	A	A	A	A	A	A	A	B	B	B
K235	A	A	B	B	B	-	B	B	B	B	B	B	B	B	B	B	B	A	A	A	-	-	A	B	B	B	B	B	B	B	B	B	B	B	B	B	B	B	B	A	A	B	B	B	B	B	B	A	A
K236	A	A	-	-	A	B	B	B	B	B	B	B	B	A	A	A	A	B	B	B	A	B	B	A	B	B	B	-	B	B	B	B	B	B	B	B	A	B	B	B	B	B	B	B	B	A	A	A	A
K237	B	B	B	B	B	A	A	A	A	B	A	A	A	A	B	B	-	-	-	A	B	B	B	B	B	B	B	B	B	B	B	B	B	B	B	B	B	A	A	A	A	A	A	A	B	A	B	B	B
K238	A	A	A	A	A	A	B	A	B	B	B	A	A	A	A	A	-	-	B	B	B	B	B	A	A	A	A	A	A	A	A	A	A	B	A	A	A	A	A	B	B	A	A	A	A	A	A	A	A
K239	A	A	A	A	A	A	A	A	A	A	A	A	B	B	B	B	B	B	B	B	B	B	B	B	-	A	A	A	A	A	A	A	A	A	A	A	A	B	B	A	A	A	A	A	A	A	A	A	A
K240	B	B	A	B	B	B	B	B	B	B	B	B	B	A	A	A	B	B	B	B	A	A	-	B	B	A	A	A	A	A	A	A	A	B	A	A	A	A	A	B	B	B	B	B	B	B	A	A	B
K241	B	B	B	B	B	B	A	A	A	A	A	B	A	A	B	B	B	B	B	B	B	B	A	B	B	B	B	B	B	B	B	A	A	A	A	A	A	A	A	A	A	A	B	B	B	B	B	B	B
K242	A	A	A	A	A	A	A	A	A	A	A	A	A	A	A	B	B	B	B	B	B	B	A	B	B	B	B	B	B	A	B	B	B	A	A	A	A	A	A	B	A	A	A	A	A	A	A	A	A
K243	A	A	A	A	A	A	A	A	A	A	A	A	A	A	A	A	A	A	A	A	A	A	B	A	A	B	B	B	B	B	B	B	B	B	B	B	B	B	B	A	A	A	A	A	B	A	B	B	B
K244	B	A	A	A	A	B	B	B	B	B	B	A	A	A	A	A	A	A	A	A	A	A	A	A	A	A	A	-	-	A	A	B	A	A	A	A	A	A	A	A	A	A	B	B	A	A	A	B	B
K245	B	B	B	B	B	B	A	-	-	B	B	B	A	A	A	A	A	B	B	B	B	B	A	A	A	A	A	A	A	A	A	A	A	A	A	A	A	A	A	B	B	B	B	B	B	B	B	A	A
K246	B	B	B	B	B	B	A	A	A	A	A	A	A	A	A	B	B	B	B	B	B	B	A	A	A	B	B	B	B	B	B	B	B	B	B	B	B	B	B	B	A	A	A	A	A	A	A	A	A
K247	A	A	A	A	A	A	A	A	A	A	A	B	A	A	A	A	A	B	B	B	B	B	A	A	A	A	A	B	B	B	B	B	B	B	A	A	A	A	A	A	A	B	B	B	A	A	A	A	A
K248	B	B	A	A	A	A	A	A	A	A	A	A	A	A	A	A	A	A	A	A	A	A	B	A	A	A	A	A	A	B	B	B	B	B	B	B	B	B	B	A	A	A	A	A	A	A	A	B	B
K249	B	B	B	B	B	A	B	B	B	B	B	A	A	A	A	A	A	-	B	B	A	B	B	A	A	A	A	A	A	A	A	A	A	B	B	B	B	B	B	B	B	B	B	A	A	A	A	A	B
K250	A	A	A	A	A	A	A	A	A	A	A	A	-	B	A	B	B	B	B	A	A	A	A	A	A	A	A	A	A	A	A	A	A	A	A	A	A	A	A	A	A	A	A	A	A	A	A	A	B
K251	B	B	B	B	B	B	A	A	B	A	A	B	A	B	B	B	B	B	B	B	B	B	A	A	A	A	A	A	A	B	B	B	B	B	B	-	B	A	A	B	B	B	B	B	A	A	A	A	B
K252	B	B	B	B	B	B	B	B	B	B	B	B	B	B	B	A	A	B	B	B	A	A	B	A	A	A	A	A	-	-	-	B	A	A	B	B	B	B	A	A	A	A	A	A	A	A	A	A	A
K253	B	A	A	A	A	A	A	A	A	A	A	A	A	A	A	B	B	B	B	B	B	B	B	B	B	A	A	B	B	B	B	B	A	A	B	B	B	B	B	A	A	A	A	A	A	A	A	A	B
K254	B	B	B	B	B	B	B	B	B	B	B	B	A	A	A	A	A	A	A	A	A	-	A	A	A	A	A	A	A	A	A	A	-	B	B	B	B	B	A	A	A	A	A	A	A	A	A	A	B
K255	B	B	B	B	B	A	A	A	B	B	B	A	B	B	B	B	B	B	B	B	A	A	B	A	A	A	A	A	A	A	A	A	A	B	B	B	A	A	A	B	B	B	B	B	B	A	A	A	B
K256	A	A	A	A	A	A	A	B	B	B	B	A	A	A	A	A	A	A	A	A	A	A	B	A	A	A	A	A	A	A	A	A	A	A	A	A	B	B	B	A	A	A	A	A	A	A	A	A	B
K257	B	B	B	B	B	A	A	A	A	A	A	A	B	B	B	B	B	A	A	A	A	A	A	A	A	A	A	A	A	A	A	B	B	B	B	B	B	B	B	B	B	B	B	B	A	A	A	A	B
K258	A	A	A	A	A	A	A	B	B	B	B	B	B	A	A	A	A	A	A	A	A	A	A	A	A	A	A	B	B	B	B	B	B	B	B	B	B	A	A	B	B	B	B	B	B	A	B	A	B
K259	A	A	A	A	A	A	A	A	B	A	A	A	A	A	A	B	B	B	B	B	B	B	A	A	A	A	A	B	B	B	B	B	B	A	A	A	B	B	B	A	A	A	A	A	A	A	A	A	A
K260	B	B	B	B	B	A	A	B	B	B	B	A	A	A	A	A	A	A	A	A	A	A	A	B	B	B	B	B	B	B	B	B	B	A	B	A	A	A	B	B	B	B	A	A	A	A	A	A	B
K261	B	B	B	B	B	B	B	B	B	B	B	B	B	B	B	B	B	B	B	B	A	A	B	B	A	A	A	A	A	A	A	A	A	A	A	A	A	A	A	B	B	B	B	A	A	A	A	A	B
K262	A	A	A	A	A	A	A	A	A	A	A	A	A	A	A	B	B	B	B	B	B	B	B	B	B	B	B	B	B	B	B	B	A	A	A	A	A	A	A	A	A	A	A	A	A	A	A	A	B
K263	A	A	A	A	A	-	-	B	A	B	B	B	B	B	B	B	A	A	A	A	B	B	B	B	B	B	B	B	B	B	B	B	B	B	B	B	B	B	B	A	A	A	A	A	A	A	A	A	-
K264	A	A	A	A	A	A	A	A	A	A	A	B	B	B	B	B	B	B	B	B	B	B	B	A	B	B	B	B	B	B	B	A	A	B	B	B	B	B	-	B	B	B	B	A	A	A	A	A	A
K265	A	A	B	B	B	-	B	B	B	B	B	B	-	B	B	A	B	B	B	B	B	B	A	A	B	B	B	B	B	B	B	A	A	A	A	-	A	A	A	B	B	A	A	A	A	A	A	A	B
K266	A	A	A	B	B	A	-	A	-	A	A	B	B	B	B	B	B	B	B	B	B	B	A	B	B	B	B	B	B	B	B	A	A	A	A	B	B	B	B	A	A	A	A	A	A	A	A	A	B
K267	B	B	B	B	B	B	B	A	A	A	A	B	A	A	A	B	B	B	B	B	B	B	A	A	A	A	A	A	A	A	A	A	A	B	B	B	B	-	A	B	B	-	A	A	A	A	A	B	B
K268	B	A	B	B	B	B	B	A	A	A	A	A	A	A	A	A	A	A	A	A	A	A	B	A	A	A	A	A	A	A	A	A	A	A	A	A	A	A	A	A	A	A	B	B	A	A	A	A	A
K269	B	B	B	B	B	A	A	A	A	B	B	A	A	A	A	A	B	B	B	B	B	B	A	B	B	B	B	B	B	B	B	B	B	A	A	A	B	B	B	A	A	A	A	A	A	A	A	B	B
K270	A	A	A	A	A	A	A	A	B	-	-	A	A	A	A	A	A	A	A	A	B	B	B	B	B	A	A	A	A	A	A	B	B	B	A	A	A	B	B	B	B	B	B	A	A	A	A	A	A
K271	A	A	A	A	A	A	A	A	A	A	A	A	B	B	B	A	A	B	B	B	B	B	B	B	A	A	A	A	A	A	A	A	A	B	B	B	B	B	A	A	A	A	A	A	A	B	B	B	B
K272	B	B	B	B	B	B	B	-	B	B	-	B	B	B	B	B	B	B	B	B	B	B	B	-	B	B	B	-	A	-	A	A	A	B	B	B	B	B	B	A	A	A	A	A	A	A	A	A	B
K273	B	A	A	A	B	A	A	-	-	-	A	B	B	B	B	B	B	A	A	A	A	-	A	A	B	B	B	B	B	B	B	-	B	B	B	B	B	B	A	B	B	B	B	B	B	B	B	B	B
K274	A	A	A	A	B	B	-	-	A	B	B	A	A	A	A	A	A	A	A	A	A	A	B	B	A	A	A	B	A	A	A	A	A	A	A	A	A	A	A	A	A	A	A	A	A	A	A	A	A
K275	A	B	B	B	B	B	B	-	B	B	B	A	A	A	A	A	A	A	A	A	A	A	B	B	B	A	B	B	B	B	B	B	B	B	B	B	B	B	A	A	A	A	A	A	A	A	A	B	B
K276	A	B	B	-	B	A	A	A	A	A	A	B	A	A	A	A	A	B	B	B	B	B	B	B	B	B	B	B	B	B	B	B	A	A	B	B	B	B	B	A	B	B	B	B	A	A	A	A	A
K277	B	B	B	B	B	B	A	-	A	-	A	B	A	A	A	B	B	B	B	B	B	B	A	B	-	A	A	B	A	A	A	A	A	B	B	B	B	B	B	A	A	A	A	A	A	A	B	A	A
K278	A	A	A	A	A	B	B	B	B	A	A	A	B	B	B	B	B	B	B	B	B	B	A	A	A	A	A	A	A	A	A	A	A	A	B	B	B	B	A	B	B	A	A	A	A	A	A	A	A
K279	B	B	B	B	B	B	A	B	B	B	B	B	B	B	A	A	A	A	A	A	B	B	A	A	A	B	B	B	B	B	B	B	B	B	B	B	B	B	B	A	A	A	A	A	A	A	A	A	A
K280	A	A	A	A	A	A	A	A	A	A	B	A	B	B	A	A	A	A	A	A	A	A	B	B	B	B	B	A	A	A	A	B	B	B	A	A	A	A	A	B	B	B	B	A	A	A	B	B	A
[truncated: 159 more columns]

## Sheet: Phenotype
RIL	Line	Heading date	Panicle length	Number of primary branches	Number of secondary branches	Number of grains per panicle	Number of panicles per plant	Number of filled grains per plant	Seed-setting rate	Grain yield per plant
		day	cm						%	g
		T601	T614	T615	T616	T617	T621	T622	T626	T627
16SK	1	74	24.6	8	28	140	12.1667	165.5	11.9365	4.03817
16SK	2	74	23.6	8	11	77	13.75	576	54.2628	16.159
16SK	3	83	30	10	16	107	11.4	192.667	24.8688	6.82487
16SK	4	81	25.4	8	8	66	10.6	170.533	32.6817	6.78993
16SK	5	83	24.4	9	26	141	12.6667	463	40.877	11.0747
16SK	6	83	29.7	9	27	147	11	691.167	56.3145	21.1345
16SK	7	95	20.6	10	23	111	10.25	450.25	58.2848	10.9692
16SK	8	88	28.3	12	43	212	14.3333	968.5	48.2641	20.519
16SK	9	81	26.8	8	9	76	18.25	801	62.1291	22.7007
16SK	10	88	20.6	8	15	82	9.71429	113	18.5029	4.09521
16SK	11	76	24.6	10	23	125	8.4	21.4667	2.56431	0.610333
16SK	12	95	23.7	9	25	138	7.66667	265.2	38.3459	6.50067
16SK	13	90	33.6	13	23	138	6.47059	94.1176	16.8848	3.24876
16SK	14	81	22.4	11	30	139	15.5	873.833	45.1593	18.654
16SK	15	97	20.3	6	7	60	9.08333	199.75	40.6616	6.869
16SK	16	74	29	9	16	101	11.75	78.875	7.77381	2.74587
16SK	17	81	22.8	15	42	199	9.25	297.125	19.63	9.69125
16SK	18	74	28.5	9	12	89	8.875	411.25	36.2096	13.5047
16SK	19	74	28	10	39	87	10	646.667	45.0848	16.1698
16SK	20	85	25.5	11	28	126	9.125	489.625	36.138	12.3981
16SK	21	78	23	11	35	163	15.8333	1043.83	51.4161	19.7432
16SK	22	74	20.1	11	6	77	14.5	527.833	47.0719	16.8277
16SK	23	90	28.9	10	25	142	10.6923	520.154	42.4882	18.1979
16SK	24	83	27.8	11	25	139	9	413.875	33.7238	12.7459
16SK	25	83	27	8	31	150	9.71429	48.7857	5.97812	0.911214
16SK	26	99	24.6	9	10	83	13.5	784.25	78.3662	25.9592
16SK	27	85	27.2	13	34	179	7.875	333.375	34.5064	7.669
16SK	28	74	22	6	21	101	9.85714	41.7857	3.43875	1.3565
16SK	29	81	27.3	13	49	210	5.83333	342	43.0189	11.2147
16SK	30	78	25.3	8	28	129	12.5	694.167	50.1324	20.6098
16SK	31	68	24.8	8	7	60	10.7778	23	2.40097	0.643111
16SK	32	88	26.4	16	31	199	12.375	698.875	39.4928	21.9901
16SK	33	83	30.2	13	56	255	12.75	581.625	28.3564	13.0241
16SK	34	81	27	11	42	190	11.6667	875	57.5027	27.6085
16SK	35	88	25.9	9	29	155	17.1667	786	46.7811	21.4077
16SK	36	113	23.8	8	15	101	13.1667	580.5	66.4188	23.1258
16SK	37	81	27.8	13	39	182	11	0.363636	0.0261677	0.00972727
16SK	38	95	27	10	43	188	15.9	406.2	17.7063	8.7588
16SK	39	71	25.52	11	23	174	16	465	33.4132	12.5487
16SK	40	83	30	12	53	226	13.5	1148.83	59.2437	20.7708
16SK	41	90	27	10	33	139	7.625	550	53.8754	25.9571
16SK	42	81	25.6	9	27	119	11.3333	666.167	45.6383	16.3927
16SK	43	81	26.3	11	34	159	18	1025.83	61.3843	27.068
16SK	44	85	28.2	10	41	189	12.5	974.167	58.7142	20.7337
16SK	45	76	25.1	10	29	151	14.5	526.75	41.4601	14.5598
16SK	46	74	24.1	9	24	122	11.1667	639.5	41.4721	15.6857
16SK	47	81	28.2	12	34	167	14	154.556	11.5666	5.02678
16SK	48	85	24	8	25	117	16	1051.5	72.4236	26.6384
16SK	49	95	27.8	13	44	188	6.125	638.25	97.9099	15.5328
16SK	50	92	30.4	10	38	209	10.3077	287.308	20.1326	7.26369
16SK	51	81	27	10	12	87	23.2	865.6	44.4353	22.5012
16SK	52	85	26.9	8	15	88	16.1429	251	19.2011	8.08121
16SK	53	71	18.72	12	21	125	22.25	706	27.6754	21.287
16SK	54	88	30	14	44	199	11.5	412.333	20.8179	10.9598
16SK	55	74	29.5	13	29	150	12.5	608.833	45.1545	15.0383
16SK	56	81	31	13	50	210	9.33333	836	60.7043	17.553
16SK	57	78	26.3	9	20	104	14.3333	543	44.399	15.61
16SK	58	102	29	11	14	105	12.8333	801.5	70.3687	23.4123
16SK	59	81	23.9	11	24	109	12.125	341	34.5491	8.89487
16SK	60	81	27.3	10	19	88	22.75	576	33.5542	13.0826
16SK	61	88	25.7	11	9	92	14.6667	153.667	11.8509	4.93667
16SK	62	83	26.6	10	24	121	10.3529	431.647	32.505	10.2786
16SK	63	81	22.3	11	30	105	14.75	285.938	20.992	6.34262
16SK	64	78	26.4	13	34	155	12.9	217	15.3879	6.7934
16SK	65	95	25.6	12	55	247	7.625	507.375	41.0996	11.5654
16SK	66	74	23.8	9	44	213	14.75	1420.25	72.2498	27.861
16SK	67	78	24.7	11	15	112	15.75	183.5	17.2706	5.55575
16SK	68	78	26.2	8	27	143	19.75	1109.75	41.7572	24.3853
16SK	69	78	30.5	13	33	221	19	403.667	16.5234	8.41933
16SK	70	78	22.4	9	12	79	11.0588	22.5294	2.43453	0.858941
16SK	71	92	28.7	11	22	142	12.8	708.3	52.8779	16.5819
16SK	72	76	18.1	8	22	107	10.1667	138.944	14.2022	4.24333
16SK	73	83	27.5	11	30	172	10.8333	693.833	50.1023	14.0242
16SK	74	81	26.3	11	44	106	8.83333	507.333	58.2695	11.9752
16SK	75	92	25.2	14	52	253	12.1667	985.167	53.5223	19.1795
16SK	76	85	25.4	11	20	125	10.3	411.8	34.005	13.8064
16SK	77	78	27.2	10	38	141	7.83333	728	64.5104	17.7805
16SK	78	81	29.7	11	31	175	13.4167	96.6667	6.39013	2.83408
16SK	79	95	21.5	12	27	141	7.9	697.4	63.771	20.6097
16SK	80	76	21.5	6	11	62	20.1	291.2	26.2911	7.7485
16SK	81	83	23.8	7	22	102	9.9	272.5	22.9146	9.7093
16SK	82	88	24.4	10	18	111	17	568.125	46.0253	16.9109
16SK	83	76	24.5	9	8	68	11.6	270	28.0287	10.158
16SK	84	74	21.9	10	25	131	12.7	282.8	24.7397	9.0756
16SK	85	81	26.7	10	28	146	14.3333	944.333	62.587	28.6
16SK	86	99	38.9	15	43	242	11	1255.88	69.7999	32.7004
16SK	87	99	24.8	9	17	101	12.5	241.3	23.6129	8.2162
16SK	88	83	32.4	15	75	350	10.5	1645	72.7313	30.618
16SK	89	88	29.8	10	31	132	11.125	494	53.4415	18.8526
16SK	90	81	30.1	13	61	274	15.625	998	37.7351	25.3247
16SK	91	83	22	12	26	140	12	607	51.6303	14.3603
16SK	92	83	24.8	11	16	110	16.75	1243	73.1714	28.014
16SK	93	81	28.4	10	22	104	16.625	516.625	34.1627	15.4138
16SK	94	83	21.9	9	17	97	12.9	197	17.7702	4.2588
16SK	95	83	25.6	8	26	123	15.6667	723	51.0293	17.8105
16SK	96	97	25.1	12	20	118	8.83333	878	69.8303	31.6182
16SK	97	85	33	10	20	119	13.25	88.5	7.83475	2.75142
16SK	98	85	26.2	13	26	153	9.83333	560.667	43.6543	17.1752
16SK	99	92	21	10	20	122	10	698.25	67.6026	22.3347
16SK	100	88	27.1	10	32	165	14.3333	628.333	40.7259	18.4162
16SK	101	85	26.7	13	54	252	11.75	1584.5	75.0859	30.5415
16SK	102	92	28.7	9	18	102	12.8333	724.167	78.246	27.4393
16SK	103	92	23.5	12	17	117	14.1	347.9	29.371	9.5642
16SK	104	74	29.8	10	44	209	9.16667	487.167	25.7737	14.151
16SK	105	81	23.1	10	29	137	13	528.5	29.8223	13.7298
16SK	106	74	32	8	27	128	8.83333	483.167	50.673	14.1797
16SK	107	85	26	11	32	163	13.25	1192.25	71.3495	28.55
16SK	108	68	23.7	8	17	100	21.2667	157.4	12.903	3.34007
16SK	109	88	27.3	12	28	135	9.2	216.1	24.7367	6.574
16SK	110	85	26.7	16	50	240	9.125	627.25	41.6743	16.801
16SK	111	76	21.7	10	29	141	14.875	439.875	23.1879	10.5974
16SK	112	81	25.4	7	20	88	11.6	281	22.4656	8.3987
16SK	113	88	25.7	9	21	113	8.11111	18.5556	3.24083	0.536
16SK	114	83	27	12	44	204	11	498.125	29.6768	10.9304
16SK	115	76	25.9	11	27	111	7.94444	35.2222	3.91334	1.09406
16SK	116	85	22.5	9	28	127	9.17647	193.588	23.6967	5.30194
16SK	117	71	26.6	12	40	192	17.9091	88.5455	6.89802	2.21673
16SK	118	83	24.9	15	58	239	10.2	142.1	8.88514	4.6103
16SK	119	81	26.8	12	44	198	11.375	377	25.2237	8.10337
16SK	120	88	24.3	9	22	115	11.25	383.75	40.673	13.636
16SK	121	90	24.5	12	34	160	9.2	210.4	20.4351	5.9693
16SK	122	83	26.6	12	41	161	15.125	650.375	36.5585	13.6094
16SK	123	74	24.65	10	17	94	15.6667	28.7778	1.82716	0.953667
16SK	124	85	26.5	14	26	146	10.1667	902.833	69.4398	24.7862
16SK	125	90	27.3	9	25	116	8.9	164.7	21.3094	5.8604
16SK	126	83	33.6	13	46	229	10	1139	64.0517	25.56
16SK	127	71	21.5	8	18	95	19.5556	32.8333	2.38431	0.897167
16SK	128	99	27.5	9	11	92	12.75	630.5	71.7394	18.1924
16SK	129	92	23.1	9	39	165	10.4	426.5	32.4754	10.9988
16SK	130	85	28.9	9	36	152	10.9	673.1	42.8781	21.5111
16SK	131	85	26.4	10	23	119	13.3333	604.667	47.964	17.4207
16SK	132	92	29.1	15	64	297	10.25	924.5	58.3143	21.6556
16SK	133	83	26.8	10	23	116	13.875	486.25	23.7108	10.195
16SK	134	95	27.8	14	48	200	7.07143	11.7143	1.98764	0.335714
16SK	135	88	22.9	11	32	171	13.1	489.6	29.2211	12.5612
16SK	136	92	28.9	14	41	174	8.875	694.875	57.7378	22.2757
16SK	137	81	24.3	8	30	128	12.3	231	18.0145	4.3541
16SK	138	74	23.5	6	21	97	9.52941	21.4706	2.22263	0.465588
16SK	139	97	23.9	10	18	113	12.625	622.125	66.7158	20.1474
16SK	140	74	27.5	9	30	154	9.6	184.4	8.46998	4.1334
16SK	141	83	33.7	11	48	221	8.16667	654.667	61.0791	20.439
16SK	142	108	32.3	13	42	219	10.875	325.5	38.5949	10.4972
16SK	143	95	21.7	11	17	99	12.5	1041.33	60.2856	34.0778
16SK	144	74	23.7	8	19	96	15.375	404.75	42.2992	11.34
16SK	145	95	24.2	12	28	147	9.16667	667	62.424	24.1137
16SK	146	78	30.9	11	51	230	6.625	232.875	26.565	5.74287
16SK	147	95	32.8	16	17	142	6.8	371	48.5602	12.6496
16SK	148	71	23.28	8	29	121	12.5	166.4	17.3081	5.4766
16SK	149	68	25.3	9	28	149	10.25	471.5	43.0594	13.5508
16SK	150	92	23	11	27	136	10.25	548	65.2284	17.9696
16SK	151	90	26.8	9	30	130	9.125	344.875	41.4016	10.5455
16SK	152	71	17.51	8	10	60	12.25	210.75	29.8566	6.5025
16SK	153	85	24.2	10	22	14	9.5625	123.438	9.85676	3.42612
16SK	154	92	20.6	9	34	150	13.7059	330	26.3368	7.45494
16SK	155	71	20.41	10	23	115	9.73333	28.3333	3.54226	0.490467
16SK	156	85	23.7	8	18	94	10.2308	180.846	26.0441	4.57292
16SK	157	120	29	14	15	123	12.9	353.4	42.9927	9.4968
16SK	158	76	24.2	9	18	82	11.8571	69.9286	8.9529	2.08893
16SK	159	68	18	6	5	49	12.0667	1.13333	0.158745	0.0497333
16SK	160	74	27.2	14	32	180	9.18182	225.182	18.6479	6.84227
16SK	161	95	29.3	11	23	132	11.375	792.5	74.387	21.0674
16SK	162	83	23.5	9	24	114	10.1	357.4	29.5616	9.8096
16SK	163	92	27	13	54	270	10.8333	1098	63.0189	22.5642
16SK	164	78	34.5	12	47	222	11.25	610	43.7904	19.6032
16SK	165	92	23.2	9	12	89	10.7778	198.056	21.9007	5.6245
16SK	166	102	24.1	10	25	121	16.6	703.7	66.6761	19.4165
16SK	167	92	21.2	9	32	143	9.1	623.4	52.8753	16.9141
16SK	168	83	25.8	10	37	145	9.6	400.9	43.7903	10.3761
16SK	169	85	25.3	10	22	120	8.4	312.1	45.0751	8.8039
16SK	170	97	18.7	11	17	65	5.71429	94.2857	20.1527	2.39714
16SK	171	83	26	8	15	82	11.3	340	35.7331	9.9275
16SK	172	71	27.9	12	19	118	15.3	280.2	17.8824	7.8499
16SK	173	76	22.7	11	28	139	10.8235	94.2353	10.864	2.91159
16SK	174	78	30.2	13	32	173	16.2353	147.588	50.7074	3.33553
16SK	175	74	24.8	8	24	113	22.5	136	9.99724	3.66981
16SK	176	76	23.5	9	18	123	13.2778	214.5	17.9992	4.17967
16SK	177	83	26.4	7	21	94	11.8333	417	45.5821	14.2382
16SK	178	83	24.6	14	37	207	9.125	215.5	15.6841	5.06475
16SK	179	83	32.6	10	24	128	12.4	259.6	21.5204	7.849
16SK	180	90	19.3	8	9	60	9	76.0667	11.4169	2.76093
16SK	181	71	21.9	8	32	118	12	530.833	43.0347	10.7893
16SK	182	90	23.5	11	38	164	14.75	647	43.924	18.1821
16SK	183	88	24.2	10	11	90	13.75	569.875	74.0218	18.09
16SK	184	83	27.3	10	27	155	16.7273	173.545	14.0543	3.93073
16SK	185	97	26.3	10	35	166	13.125	843.25	59.9858	25.0906
16SK	186	68	25.1	9	23	122	10.1111	167.222	17.9199	4.698
16SK	187	85	25.5	10	17	93	11.5	3.7	0.444391	0.1128
16SK	188	78	22.7	10	23	135	15.625	633.125	25.3174	10.8494
16SK	189	90	27	9	26	126	6.61538	135.538	17.2188	3.76277
16SK	190	71	22.53	8	19	97	9.63636	28.5455	2.60949	0.889273
16SK	191	71	22.6	7	24	101	9.23529	34.4118	5.17791	0.888412
16SK	192	83	29.6	12	26	144	10.2143	298	24.6747	11.1578
16SK	193	90	27.7	12	43	203	10.1667	942.167	70.1365	17.8663
16SK	194	99	22.9	13	31	163	9.5	1073.12	65.4594	24.1539
16SK	195	99	25.3	14	16	133	10.75	635.25	48.4138	19.9109
16SK	196	83	22	8	26	132	14.125	294.5	16.3079	7.72425
16SK	197	95	25.2	12	38	185	11.625	893.25	59.3966	22.9387
16SK	198	74	22.2	9	10	64	17	9.9	1.14016	0.3158
16SK	199	85	22.1	7	15	76	7.27273	4.27273	1.40845	0.169273
16SK	200	76	21.8	9	22	104	15	406.5	29.2376	9.94617
16SK	201	75	21.9	7	4	53	9.75	56.25	12.6832	2.40342
16SK	202	76	30.7	13	33	191	13.8333	390.667	21.4928	9.91167
16SK	203	83	30.9	10	23	140	13.75	1120.5	89.6579	30.9298
16SK	204	83	29.4	8	41	188	13	825.833	49.3821	15.8415
16SK	205	92	32.8	11	38	194	10.375	570.125	49.5115	19.253
16SK	206	83	34.2	11	43	202	10.25	612.75	40.1014	15.704
16SK	207	88	21.8	10	17	107	14.5385	337.308	28.0766	8.14646
16SK	208	99	28	11	27	159	12.75	1158.12	82.4508	28.4775
16SK	209	76	27.5	10	14	29	12.625	287.875	28.7193	8.66512
16SK	210	83	24.5	12	37	165	8	681.333	66.3313	15.8932
16SK	211	81	27.4	14	38	215	16	820	51.6481	18.5375
16SK	212	81	21.2	8	31	146	12.625	242.375	15.1757	5.43825
16SK	213	76	27	10	32	158	9.6875	349.5	28.7433	7.83869
16SK	214	99	24.3	11	34	151	15.125	1082.62	66.963	28.6686
16SK	215	88	25.9	14	28	158	15.3333	360.222	21.067	9.43178
16SK	216	92	29.4	15	56	234	8.8	504.1	35.485	10.664
16SK	217	92	24.7	10	40	183	11.875	611.125	50.5114	14.75
16SK	218	90	24	12	44	172	8.5	501.5	49.9005	16.641
16SK	219	81	18.5	6	6	50	8.8125	45.75	13.1678	1.37369
16SK	220	88	22.4	10	20	114	11.375	636.5	55.6807	19.0213
16SK	221	90	23.5	10	12	89	12.5556	96.6111	10.481	3.02006
16SK	222	97	27	10	19	100	9.625	622.875	50.733	15.9694
16SK	223	83	24.1	9	24	122	8.9375	77.625	8.70662	2.60731
16SK	224	85	23.8	10	24	117	13.1667	839.167	69.0862	25.5937
16SK	225	83	23.7	12	42	208	9.3	458.1	32.1609	11.5573
16SK	226	95	21.7	10	17	109	14.5	99.25	7.39109	2.67167
16SK	227	76	25.3	11	43	134	10.8333	479.167	36.1136	9.956
16SK	228	68	22.6	9	26	136	9.35714	128.214	12.0292	3.80186
16SK	229	78	21.6	8	5	59	12.9333	253.533	15.7781	4.85853
16SK	230	92	22.1	6	5	45	7.42857	86.7143	27.2564	3.31743
16SK	231	81	23.32	10	16	106	13.8333	393.5	48.9936	11.8495
16SK	232	74	28.9	12	26	140	10.6667	434.667	51.9418	13.8693
16SK	233	88	24.8	9	21	103	14.3	551.4	48.5858	12.815
16SK	234	74	24.2	9	29	129	13.6364	214	17.3804	6.13245
16SK	235	88	19	9	14	93	11.4706	58.8235	6.72224	2.04476
16SK	236	83	24	10	36	113	6.5625	31	5.19862	0.933187
16SK	237	95	28.2	10	18	121	6.5	304.5	43.0389	12.9857
16SK	238	92	30.6	13	41	194	8.07143	301.643	26.2673	8.75671
16SK	239	102	27.5	15	14	133	9.875	1078.75	83.624	25.7965
16SK	240	71	28.41	9	31	155	8.91667	10.8333	1.02025	0.220917
16SK	241	83	22.3	9	15	96	16.6667	94.6667	9.39153	2.836
16SK	242	88	26	10	27	131	9.5	561.875	58.7045	15.3282
16SK	243	76	20.4	10	20	116	7.6	77.7333	10.7376	2.2382
16SK	244	76	25.7	11	30	148	10.7222	280.722	21.8319	7.09372
16SK	245	83	24	8	28	132	11.1667	383.5	38.1023	10.8218
16SK	246	102	28.1	9	5	66	13.3333	347.5	50.7917	17.5333
16SK	247	83	25.9	11	21	121	13.3333	757.667	67.0699	16.0805
16SK	248	83	28	13	43	208	12.6667	151.467	11.4666	3.5118
16SK	249	81	25.4	9	23	129	19.1111	148.667	9.72525	3.83089
16SK	250	78	23.2	11	22	113	9.33333	826.167	70.7637	20.2528
16SK	251	76	27	11	14	101	15.4615	214.923	19.4568	5.234
16SK	252	78	28.3	11	19	113	10.7647	42.8824	3.60623	1.13841
16SK	253	95	22	14	29	167	12.625	859.875	59.859	19.7181
16SK	254	78	25	12	29	144	9.1	477.3	42.1569	14.1584
16SK	255	81	31.9	11	38	198	13.25	385	19.1067	10.1714
16SK	256	83	29.1	15	60	288	12.75	1478	64.457	27.5765
16SK	257	95	20.4	11	11	100	12.125	785	74.6908	23.311
16SK	258	74	23.4	9	25	121	19.5	168.8	9.02674	3.2247
16SK	259	90	21.2	12	15	91	9.75	479.625	50.2422	13.1445
16SK	260	74	24.3	9	29	141	10.8889	343.111	33.5616	8.92633
16SK	261	74	28.38	7	24	112	10.3333	316	27.0509	7.007
16SK	262	76	33.8	12	31	182	10.1111	21.4444	1.62171	0.783222
16SK	263	88	21.7	8	10	71	12.3	142.4	20.2388	4.822
16SK	264	85	23.3	17	36	201	8.5	201.1	14.6106	5.9618
16SK	265	71	20.61	10	31	116	15.6667	109.583	8.0948	3.46267
16SK	266	83	26	13	30	150	11.6	342.6	24.605	11.0219
16SK	267	76	31.5	10	19	139	14.7	89.2	7.87986	2.4901
16SK	268	81	26.6	11	16	105	13.2308	289.846	29.323	7.36523
16SK	269	83	25.4	10	26	133	10.1667	590.167	50.2412	20.1545
16SK	270	83	20.5	9	12	77	19.625	697.625	54.9095	18.202
16SK	271	95	23.5	14	33	164	11.125	727.5	40.9657	16.4935
16SK	272	95	29.3	12	16	120	8	315.8	45.0499	11.4925
16SK	273	83	19.5	9	24	128	10.7143	2.71429	0.330492	0.0791429
16SK	274	90	29	13	30	137	12.7	610	46.9123	15.4806
16SK	275	83	25.4	11	28	159	10.0556	150.611	15.1936	4.54783
16SK	276	74	21	10	16	106	9.66667	573.833	64.2351	22.4832
16SK	277	92	34.6	13	17	114	7	261.5	32.0613	9.51375
16SK	278	74	28.7	11	28	165	29.8333	307.833	10.7446	8.74417
16SK	279	102	32.5	11	32	178	11.5	801.375	63.4062	27.5604
16SK	280	76	22	7	30	143	10.5	506.167	41.1295	12.459
MIN		68	17.51	6	4	14	5.71429	0.363636	0.0261677	0.00972727
MAX		120	38.9	17	75	350	29.8333	1645	97.9099	34.0778
AVER		83.9321	25.7066	10.45	27.2536	138.657	11.9888	456.66	35.7778	12.2183
SD		8.50699	3.47794	2.11142	12.1953	49.8109	3.36578	329.667	21.9604	8.23683

## Sheet: G-P
data type ri self
278 208 28
RM1282	B	B	B	A	A	A	A	B	A	A	A	A	B	B	A	B	A	B	B	A	A	A	B	B	B	A	B	A	B	A	B	A	B	A	B	B	B	B	B	B	A	B	B	A	A	B	-	A	A
RM1247	B	B	B	B	A	A	A	B	B	A	A	A	B	B	A	B	A	B	B	A	A	A	B	B	B	A	B	A	B	A	B	A	B	A	B	B	A	B	B	B	A	B	B	A	A	B	-	A	B
JD1014	B	B	B	B	A	A	A	B	B	A	A	A	B	B	A	A	A	A	B	A	A	A	B	B	A	A	A	A	-	A	B	A	B	A	B	B	A	-	A	B	A	B	B	A	A	B	-	A	B
JD1015	B	B	B	B	A	A	A	B	B	A	A	A	B	B	A	A	A	A	B	A	A	A	B	B	A	A	A	A	-	A	B	A	-	A	B	B	A	-	A	A	A	A	-	A	A	B	-	A	B
JD1016	A	B	A	B	A	A	A	B	B	A	A	A	B	B	A	A	A	A	B	A	A	A	B	B	A	A	A	A	B	A	B	A	A	A	B	B	A	-	A	A	A	A	-	A	A	B	-	A	B
JD1006	A	B	A	B	A	A	A	A	B	A	A	A	B	B	A	B	A	A	B	A	A	A	A	B	A	A	A	A	-	A	B	A	A	B	B	B	A	A	B	A	A	A	-	A	A	B	B	A	A
JD1007	A	B	B	B	A	A	A	B	B	B	A	A	A	B	A	B	A	A	A	A	A	A	A	B	A	A	A	A	A	A	B	A	A	B	A	A	A	B	A	A	A	A	-	A	A	A	B	A	A
RM10609	B	B	B	-	A	A	A	A	B	B	B	A	A	A	-	-	A	A	A	A	A	A	A	B	A	A	-	-	B	A	-	A	A	B	A	B	A	A	A	A	B	B	-	A	A	A	B	A	A
RM3412	B	B	B	B	-	A	A	A	B	B	B	A	A	A	A	B	A	A	A	B	A	B	A	B	A	A	A	B	B	A	B	A	-	B	-	B	A	A	A	B	B	B	-	A	A	A	B	A	A
RM7075	B	B	B	B	B	A	-	A	B	B	B	A	B	A	A	B	A	A	A	A	A	B	B	B	A	A	A	B	B	A	B	A	A	B	B	B	A	A	B	B	B	B	A	A	A	A	B	A	B
RM8139	B	B	B	-	B	A	A	A	B	-	B	A	B	A	A	-	A	A	A	A	A	A	A	B	A	A	A	B	B	A	-	A	A	B	B	B	A	A	-	B	B	B	A	A	A	A	B	A	B
RM11295	B	B	B	B	B	A	A	A	B	B	B	A	B	B	A	A	A	A	A	A	B	A	A	B	A	A	A	A	B	B	B	A	A	B	A	B	A	A	B	B	A	B	A	A	A	A	B	B	B
RM11504	B	B	B	B	B	A	A	B	B	B	B	B	A	B	B	B	A	B	A	A	B	A	A	B	B	A	B	A	B	A	B	B	A	B	A	B	B	A	B	A	A	B	A	A	A	A	B	A	B
JD1003	B	B	B	B	B	A	A	B	B	B	A	B	A	B	B	B	A	B	A	B	B	A	A	B	B	A	B	A	A	A	B	B	B	A	A	B	B	A	B	A	A	B	A	A	B	A	B	A	A
JD1004	B	B	B	B	B	A	A	B	B	A	A	B	A	B	B	B	A	B	A	B	B	A	B	B	B	A	B	A	A	A	B	B	A	A	A	A	B	A	B	A	A	B	B	A	B	A	A	A	A
RM1003	A	B	B	B	B	A	A	B	B	A	B	B	B	B	B	B	A	B	B	B	A	A	B	B	B	A	B	A	A	A	B	B	A	B	B	B	B	A	A	A	A	B	B	A	A	B	A	A	B
RM3403	A	B	B	B	B	A	A	A	B	A	B	B	B	B	B	B	A	B	B	B	A	A	B	B	A	A	B	A	A	A	B	B	A	A	A	A	A	A	A	A	A	B	B	A	A	B	A	A	A
RM8232	A	B	B	B	B	A	A	A	B	A	B	B	B	A	A	B	A	A	B	A	A	A	B	B	A	A	A	B	A	A	B	A	A	A	B	A	A	A	B	A	B	B	B	A	A	B	A	A	B
JD1008	A	A	B	B	B	A	A	A	B	A	B	B	B	A	B	-	A	A	B	A	A	A	B	B	A	A	A	B	B	A	B	A	A	A	B	A	A	A	B	B	B	B	B	A	A	B	A	A	B
JD1009	A	A	B	B	B	A	B	A	B	A	B	B	B	A	B	A	A	A	B	A	A	A	B	A	B	A	A	B	B	A	B	A	A	B	B	A	A	A	B	A	B	B	B	A	A	B	A	A	B
D1019	B	B	B	B	B	A	B	A	B	A	B	B	B	A	A	A	A	A	B	A	B	A	B	B	A	B	A	B	B	A	A	B	-	B	A	B	A	A	A	B	A	B	A	A	A	B	A	B	B
RM6840	B	B	B	B	-	A	B	B	B	A	B	B	B	A	A	A	A	A	A	A	B	A	B	B	A	B	A	B	B	A	A	B	-	B	A	B	A	A	A	B	A	B	A	A	B	A	A	B	B
RM6367	A	A	B	A	-	A	B	B	A	B	A	B	A	B	B	B	B	B	B	A	B	B	B	A	B	A	B	B	B	A	B	A	B	A	A	A	-	B	B	A	B	A	B	B	A	B	A	A	A
RM12570	A	A	B	A	A	B	B	B	A	B	A	B	A	B	B	B	A	B	B	A	B	B	B	A	A	A	B	B	B	A	B	A	B	A	A	A	B	A	B	A	B	A	A	A	A	B	A	A	A
RM6378	A	A	B	A	A	B	A	B	B	B	A	B	-	A	A	B	A	B	A	A	B	B	B	A	A	A	B	B	B	B	B	A	A	A	A	A	A	B	B	A	A	A	A	A	B	A	A	A	A
W236	A	A	B	B	A	B	A	B	B	B	A	B	-	A	B	B	B	B	A	B	B	B	B	B	A	A	B	B	B	B	B	A	A	A	A	B	B	A	B	A	A	A	A	A	B	A	B	A	A
W004	A	A	B	B	A	B	A	A	A	B	A	B	-	-	B	B	B	B	A	B	B	B	B	B	A	A	B	B	B	B	B	A	A	A	A	B	B	-	B	A	B	A	A	A	B	A	B	A	A
RM12987	A	A	B	B	A	B	A	A	A	B	A	B	A	-	B	B	B	B	A	B	B	B	B	B	B	B	B	B	-	B	-	B	A	A	A	B	B	-	B	A	B	A	A	A	B	A	B	-	A
RM6374	A	A	B	B	-	B	A	B	A	B	A	B	A	B	B	B	B	B	A	A	B	B	B	B	B	B	B	B	A	B	A	B	A	A	A	B	B	B	B	A	B	A	A	A	B	A	B	A	A
JD2001	A	B	B	B	-	B	A	B	B	B	A	B	A	-	B	B	B	B	A	A	B	B	B	B	B	B	B	B	-	-	-	B	B	A	A	B	B	-	-	A	B	A	A	B	B	A	B	B	A
JD2002	A	B	B	B	-	B	A	B	B	B	A	B	A	-	B	B	B	B	A	A	B	B	B	B	B	B	B	B	A	B	A	B	B	A	A	B	B	B	B	A	B	A	A	B	B	A	B	B	A
JD2011	A	B	B	B	-	B	A	B	B	B	A	B	A	-	B	B	B	B	A	A	A	B	B	B	A	B	B	B	A	A	A	B	B	A	A	B	B	B	B	A	B	A	A	B	B	A	B	B	A
JD2029	A	B	B	B	-	B	A	B	B	B	A	B	A	B	-	B	B	B	A	A	A	B	B	B	B	B	B	B	A	A	A	B	B	B	A	B	B	A	A	A	B	A	A	A	B	A	B	A	A
JD2006	A	A	B	B	-	B	B	B	A	B	A	B	B	B	-	B	B	B	A	A	A	B	B	B	B	B	B	B	A	A	A	B	B	A	A	B	B	A	A	A	B	A	A	A	B	A	B	A	A
RM1367	A	A	B	B	A	B	B	B	A	A	A	A	B	B	A	B	B	B	A	A	B	B	B	A	B	B	B	B	A	A	A	B	B	A	A	B	B	A	B	A	B	A	A	A	B	A	B	A	A
RM6	A	A	B	B	A	A	-	B	A	A	A	A	B	B	A	B	B	B	A	A	B	B	B	A	B	-	B	B	A	A	A	B	B	A	A	B	A	A	A	A	B	A	A	A	B	A	B	A	B
JD2008	A	B	B	B	A	A	A	A	B	A	A	A	B	B	A	B	B	B	A	A	B	B	B	A	B	A	B	B	A	B	B	B	B	A	A	B	B	A	-	A	B	A	A	A	B	A	B	A	B
JD2009	A	B	B	B	A	A	A	B	B	A	A	A	B	B	A	B	B	A	A	A	B	B	A	A	A	B	A	B	B	B	B	B	B	A	A	B	B	A	-	A	B	A	A	A	B	A	B	A	B
JD2010	A	B	B	B	A	A	A	B	B	A	A	A	B	B	A	B	B	A	A	A	B	B	A	A	A	B	A	B	B	A	B	B	B	A	A	B	B	A	B	A	B	A	A	B	B	A	B	B	A
JD3013	B	B	A	A	B	A	A	B	A	A	B	A	A	B	A	A	A	A	B	A	B	B	A	B	B	A	A	B	A	B	A	B	B	A	B	A	B	-	A	A	A	A	B	B	B	B	A	B	A
JD3002	B	B	A	A	B	A	A	B	A	A	B	A	A	B	A	A	A	A	B	A	B	B	A	B	B	A	A	B	B	B	B	B	A	A	B	A	B	-	B	A	A	A	B	B	B	B	A	B	A
JD3011	B	B	B	B	B	A	A	B	A	A	B	A	A	B	A	A	A	A	B	A	B	A	A	B	B	A	A	B	B	B	B	B	A	A	B	A	B	-	B	A	A	A	B	B	B	B	A	B	A
JD3012	B	B	B	B	B	A	A	B	A	A	B	A	A	A	A	A	A	A	B	B	B	A	A	B	B	A	A	B	B	B	B	B	A	A	B	A	B	B	B	A	A	A	B	B	B	B	A	B	A
RM2421	A	B	-	B	-	A	A	B	A	A	B	A	A	A	A	A	A	A	B	A	A	A	A	B	B	A	A	B	A	B	-	B	A	A	B	A	B	-	B	A	A	A	B	B	B	B	A	B	A
RM3131	A	B	B	B	A	A	A	B	A	A	B	A	A	A	A	A	A	A	A	A	A	A	B	B	B	A	A	A	A	A	B	A	A	A	A	A	B	-	A	A	A	A	A	B	A	A	A	B	B
JD3005	A	B	A	B	A	A	A	A	A	A	B	A	A	A	A	A	A	A	A	A	A	A	A	B	A	A	A	A	A	A	A	A	A	A	B	A	A	-	A	A	A	A	A	B	A	A	A	B	A
JD3006	A	A	A	B	A	A	A	A	A	A	B	A	B	A	A	B	A	B	A	A	A	A	B	B	B	A	B	A	A	A	A	A	A	A	B	A	A	A	A	A	-	A	A	B	A	A	A	B	A
RM6080	A	A	A	A	A	A	B	A	A	A	B	A	A	A	A	A	B	B	A	A	A	A	B	A	A	A	B	B	A	A	A	A	B	A	A	A	A	-	A	A	A	A	A	B	A	A	A	A	A
RM6914	A	A	A	A	A	A	B	A	A	A	B	A	A	A	A	B	B	A	A	A	A	A	B	A	A	A	A	B	A	A	A	-	B	A	A	A	A	A	A	A	A	A	A	B	A	A	A	A	A
RM2453	A	A	A	A	A	A	B	A	A	A	B	A	A	A	A	B	B	A	A	A	A	A	B	A	A	A	A	B	A	A	A	A	B	A	A	A	A	A	A	A	A	A	A	B	A	A	A	A	A
RM7370	A	A	A	A	A	A	B	A	A	A	B	A	A	A	A	B	B	A	A	A	A	A	B	A	A	A	A	B	A	A	A	-	B	A	A	A	A	A	A	A	A	A	A	B	A	A	A	A	A
RM16	A	A	A	A	A	A	B	A	A	A	B	A	A	A	B	B	B	A	A	A	A	A	B	A	A	A	A	B	A	A	A	B	B	A	A	A	A	A	A	A	A	A	A	B	A	A	A	A	A
RM15475	A	A	A	A	A	A	B	A	A	A	B	A	A	A	B	B	B	A	A	A	A	A	B	A	A	A	A	B	A	A	A	B	B	A	A	A	A	A	A	A	A	A	A	B	A	A	A	A	A
L394	A	A	A	A	A	A	B	A	A	A	B	A	A	A	B	B	B	A	A	A	A	A	B	B	A	A	A	B	A	A	A	B	B	A	A	A	A	A	A	A	A	A	A	B	A	A	A	A	A
RM15539	A	A	A	A	A	A	B	A	A	A	B	A	A	B	B	B	B	A	A	A	A	A	B	B	A	A	A	B	A	A	A	B	B	B	B	B	B	B	B	A	A	A	A	B	A	A	A	A	A
L3990	A	A	A	A	A	A	B	A	A	A	B	A	A	B	B	B	B	A	B	A	A	A	B	B	A	A	A	B	A	A	A	B	B	B	A	A	A	A	A	A	A	A	A	B	A	B	A	B	A
RM3513	A	A	A	A	A	A	B	A	A	A	B	A	A	B	B	B	B	A	B	A	A	A	B	B	A	A	A	B	A	A	A	B	B	B	A	A	A	A	A	A	A	A	A	B	A	B	A	B	A
RM2334	A	A	A	A	-	A	B	A	A	B	B	A	A	B	B	A	B	A	B	A	A	A	A	B	A	A	A	B	A	A	A	A	B	A	A	A	A	A	A	A	A	B	A	A	A	B	A	A	A
RM3525	B	A	A	B	-	B	B	A	A	B	B	A	A	B	A	A	A	A	B	A	A	B	B	A	A	B	A	B	B	A	B	A	B	B	A	A	A	A	B	A	B	B	A	A	B	B	A	A	A
JD3008	B	B	A	B	-	A	B	A	A	B	B	A	A	A	A	A	A	B	A	A	A	A	A	A	B	B	B	B	A	A	B	A	A	B	A	A	A	A	B	A	B	A	A	A	B	A	A	A	A
JD3003	B	B	A	-	B	A	B	A	-	B	B	A	A	A	A	A	A	B	A	A	A	A	A	A	B	B	B	-	A	B	B	-	A	B	A	A	A	A	B	A	B	A	A	A	B	A	A	A	A
JD3014	B	B	A	B	B	A	B	A	A	B	B	B	A	A	A	A	B	B	A	B	A	A	A	B	B	B	B	B	A	B	A	-	A	B	A	A	B	A	B	A	B	A	A	A	B	A	A	A	A
JD3015	B	B	A	B	B	A	B	A	A	B	B	B	A	A	A	A	A	B	A	B	A	A	A	B	B	B	B	B	A	B	A	-	A	B	A	A	B	A	B	-	B	A	A	A	B	A	A	A	A
JD3004	B	B	A	B	B	A	B	A	A	B	B	B	A	A	A	B	A	B	A	B	A	B	A	B	B	B	B	B	A	B	A	-	A	A	B	B	B	A	B	A	B	A	A	A	B	A	A	A	A
JD3016	B	B	A	B	B	A	B	A	A	B	B	B	A	A	A	B	A	B	A	B	A	B	A	B	B	B	B	B	A	B	A	-	A	A	B	B	B	A	B	A	B	A	A	A	B	A	A	A	A
JD4003	A	B	B	-	A	A	B	B	B	B	A	A	B	A	A	A	A	B	A	A	A	B	B	A	B	A	B	A	A	A	A	B	A	B	A	A	-	B	B	A	B	B	B	B	B	A	B	B	A
RM16354	A	B	B	B	A	A	B	B	B	A	A	A	B	A	A	A	A	A	A	A	A	B	B	A	B	A	A	A	B	A	A	A	A	B	A	A	-	B	B	A	B	A	B	B	B	A	A	B	A
RM1305	A	B	B	B	A	B	B	B	B	A	A	A	A	A	A	A	A	A	A	A	A	B	B	A	B	A	A	B	B	A	A	A	A	B	A	A	-	B	B	A	A	A	B	A	B	A	A	B	A
JD4006	B	B	B	B	A	B	B	B	B	A	A	A	A	B	A	A	A	A	A	A	A	B	B	A	B	-	A	B	B	A	A	A	A	B	A	B	-	B	B	A	A	A	B	A	B	A	A	B	A
JD4009	B	B	B	B	A	B	B	B	B	A	A	A	A	B	A	A	A	A	A	A	A	B	B	A	B	A	A	B	B	A	A	A	A	B	A	B	B	B	B	A	A	A	B	A	B	A	A	B	A
JD4005	B	B	B	B	A	B	B	B	B	A	A	A	A	B	A	A	A	A	A	A	A	B	B	A	B	A	A	B	B	A	A	A	A	B	A	B	-	B	B	A	A	A	B	A	B	A	A	B	A
RM16592	B	B	B	B	A	B	B	B	B	-	A	A	A	B	A	A	A	A	A	A	A	B	B	A	B	A	A	B	B	A	A	A	A	B	A	B	-	B	B	A	A	A	B	A	B	A	A	B	A
RM5687	B	B	B	B	A	B	B	A	B	A	A	A	B	B	A	A	A	A	A	A	B	B	B	A	B	B	A	B	B	A	-	A	A	B	A	B	-	B	B	B	A	A	A	B	B	A	A	B	A
RM16741	B	B	B	-	A	B	A	A	B	-	B	A	B	B	-	-	A	-	A	A	B	B	-	B	B	B	-	B	B	-	-	A	A	B	B	B	-	B	-	B	A	A	A	B	B	A	A	B	A
RM471	B	B	A	B	A	B	B	B	B	A	B	A	B	B	A	A	A	A	A	A	B	B	B	B	B	B	A	B	B	A	-	A	A	B	A	A	A	B	B	B	A	A	A	B	B	A	A	B	A
RM6997	B	B	B	B	-	B	B	B	B	A	B	A	B	B	A	A	A	A	A	B	B	-	A	B	B	B	A	B	B	A	-	B	A	B	-	A	B	A	B	B	A	A	A	B	B	A	B	B	A
RM3839	B	B	A	B	A	B	A	B	B	A	B	A	B	B	-	B	B	A	A	B	A	-	A	B	B	A	A	B	B	A	A	B	A	A	B	A	A	A	A	B	A	A	A	B	B	A	A	B	A
RM1388	B	B	A	B	A	B	A	B	B	A	B	A	B	A	B	B	B	A	A	B	A	-	A	A	B	A	A	B	B	B	A	B	B	A	B	B	A	A	A	B	A	A	A	B	B	A	A	B	B
RM2636	B	B	A	B	-	A	A	B	B	A	B	B	A	A	B	B	B	A	A	B	A	A	A	A	B	A	A	B	B	B	A	A	B	A	A	A	B	A	B	B	A	A	A	A	B	A	A	A	B
RM5511	B	B	B	B	-	B	A	B	B	A	B	B	A	B	B	B	B	A	B	B	A	A	A	A	B	B	A	B	B	B	A	A	B	A	A	A	A	A	A	B	A	A	A	B	B	B	B	B	A
RM1113	B	A	B	B	-	B	B	A	B	A	B	B	A	A	B	B	A	B	B	-	B	A	A	A	B	B	B	B	B	B	B	A	B	A	A	B	A	A	A	A	B	B	A	B	B	B	B	B	A
JD5008	B	B	B	A	-	A	A	B	B	A	B	A	A	B	B	B	A	B	A	B	A	B	B	B	A	B	B	-	B	-	A	A	B	B	B	B	A	A	A	A	B	A	B	B	A	A	B	B	B
RM5874	B	A	B	A	-	A	A	B	B	B	B	A	A	B	B	B	B	B	A	A	A	B	B	A	A	B	B	B	B	B	-	A	B	B	B	B	A	A	B	A	B	B	B	B	A	A	B	B	B
RM17954	B	A	B	A	-	A	A	B	B	B	B	A	A	B	B	B	B	B	A	A	A	B	B	A	B	B	B	B	B	B	-	A	B	B	B	B	A	A	B	A	A	B	B	A	A	A	B	A	B
RM18055	B	A	B	A	-	A	A	B	B	B	B	A	A	B	B	B	B	A	A	A	A	B	B	A	A	B	A	B	B	B	-	A	B	B	B	B	A	B	B	A	A	A	B	-	A	A	B	B	B
JD5001	B	A	B	A	-	A	A	B	B	B	B	B	A	B	A	B	B	A	A	A	A	B	B	A	A	B	A	A	B	A	B	A	B	B	B	B	A	B	A	A	A	A	B	-	A	A	B	B	B
JD5011	B	A	B	A	-	A	A	B	B	B	B	B	A	B	A	B	B	A	A	B	A	B	B	A	A	B	A	A	B	A	B	A	B	B	B	B	A	B	A	A	A	A	B	-	A	A	B	B	B
JD5012	B	A	B	A	-	A	A	B	B	B	B	B	A	B	A	B	B	A	A	A	A	B	B	A	A	B	A	A	B	A	B	A	B	B	B	B	A	B	A	A	A	A	B	-	A	A	B	B	B
RM5140	B	A	B	A	-	A	A	B	B	B	B	B	A	B	A	B	B	A	A	B	A	B	B	A	A	B	A	A	B	A	B	A	B	B	B	B	A	B	A	A	A	A	B	-	A	A	B	B	B
JD5005	B	B	B	A	-	A	A	B	A	B	B	A	A	B	B	B	B	A	A	A	A	B	B	A	A	B	A	A	B	A	B	A	A	B	B	B	A	B	B	B	A	A	B	-	A	A	B	B	B
JD5013	A	A	B	A	-	A	A	B	A	A	B	A	A	A	B	B	B	B	A	A	A	A	A	A	A	B	B	A	A	B	B	A	B	A	B	B	B	-	B	B	A	A	B	A	A	A	B	A	B
RM5558	A	A	B	A	-	A	A	-	A	A	B	A	A	A	B	B	B	B	A	A	A	A	A	B	A	A	B	A	A	A	B	A	B	A	A	B	B	-	B	B	A	A	B	A	A	A	B	A	B
RM3870	-	A	B	A	-	A	A	-	A	A	B	A	A	A	B	A	B	B	A	A	A	A	A	B	A	A	B	A	A	A	A	A	B	A	A	A	B	B	B	B	A	A	B	A	A	A	B	A	B
RM480	A	A	B	A	B	A	A	B	A	A	A	B	A	A	B	B	B	B	B	B	B	A	A	B	A	A	B	A	B	A	B	A	B	A	A	A	B	B	A	B	A	A	A	A	A	B	B	A	B
JD5014	A	A	A	A	B	A	A	B	A	A	A	B	A	A	A	B	B	B	B	B	B	A	A	B	A	A	B	A	B	A	B	A	B	A	A	A	B	B	A	B	A	A	A	A	A	B	B	A	B
JD5015	A	A	A	A	B	A	B	B	A	A	A	B	B	A	A	B	A	B	B	B	A	A	A	B	A	A	B	A	B	A	B	A	A	A	A	A	B	A	A	A	A	A	A	A	A	B	B	A	A
RM8109	B	B	B	B	B	A	A	B	A	B	A	B	A	B	A	-	B	-	B	A	B	A	B	B	A	B	B	A	B	A	A	A	B	B	A	A	B	B	B	B	A	A	A	B	B	B	B	B	A
RM19320	B	B	B	B	B	A	A	B	A	B	A	B	A	A	A	A	B	-	B	A	B	B	B	B	A	B	A	A	B	A	A	A	B	B	A	A	B	B	B	B	A	A	A	B	B	B	B	B	A
RM8112	B	B	B	A	B	A	A	A	B	A	A	B	A	-	B	A	B	-	B	A	B	B	A	B	A	B	-	B	B	A	B	A	B	B	A	A	B	B	A	B	A	A	A	B	B	B	B	B	A
RM3805	B	A	B	A	B	A	A	A	B	A	A	A	A	A	B	A	B	-	B	A	B	B	A	B	A	B	-	B	B	A	B	A	B	B	A	A	B	B	A	B	A	A	A	B	B	B	B	B	A
RM8200	B	A	B	A	B	A	A	A	B	A	A	-	A	A	B	A	B	-	B	A	B	B	A	A	A	B	A	B	B	A	B	A	B	B	A	A	B	B	A	B	A	A	A	B	B	B	B	B	A
RM6917	B	A	B	A	B	A	A	A	B	A	A	A	A	A	B	A	B	-	B	B	B	B	A	B	A	B	A	B	B	A	B	A	B	B	A	A	B	B	A	B	A	A	A	B	B	B	B	B	A
RM2126	B	A	B	A	B	A	A	A	A	A	A	A	A	A	B	A	A	B	A	A	B	B	A	B	A	A	B	B	B	A	B	A	A	B	A	B	A	-	A	B	B	A	A	B	B	A	A	B	A
JD6001	B	A	B	A	A	A	A	-	A	B	A	A	A	A	B	A	A	A	-	A	B	B	A	B	A	A	A	B	B	A	B	B	A	B	A	B	A	A	B	B	B	A	A	B	B	-	A	B	A
JD6002	B	A	B	A	-	A	B	-	A	B	B	A	B	A	B	A	A	A	-	A	B	B	A	B	A	B	A	B	B	A	B	B	A	B	A	B	A	A	B	B	B	B	A	B	A	-	A	B	A
RM3330	B	A	B	A	A	A	B	-	A	B	B	A	B	A	B	A	B	A	-	A	B	B	A	A	A	B	A	B	B	A	B	B	A	B	A	B	A	A	B	B	B	B	A	B	A	-	A	B	A
JD6003	B	A	A	A	A	A	B	A	A	B	B	A	B	A	B	A	B	A	-	A	B	B	A	A	A	B	A	B	B	A	B	B	A	B	A	B	A	A	B	B	B	B	A	A	A	-	A	-	A
JD6004	B	A	A	A	A	A	B	A	A	B	B	A	B	A	B	A	B	A	-	A	B	B	A	A	A	B	A	B	B	A	B	B	A	B	A	B	A	A	B	B	B	B	A	A	A	-	A	-	A
RM20049	B	A	A	A	A	A	B	A	A	B	B	A	B	A	B	A	B	A	-	A	B	B	A	A	A	B	A	B	B	A	B	B	A	B	A	B	A	A	B	B	B	B	A	A	A	-	A	-	A
JD6005	B	A	A	A	A	A	B	A	A	B	B	A	B	A	B	A	B	A	-	A	B	B	A	A	A	B	A	B	B	A	B	B	A	B	A	B	A	A	B	B	B	B	A	A	A	-	A	-	A
RM3	B	A	A	A	A	A	B	A	A	B	B	A	B	A	B	A	B	A	-	A	B	B	A	A	A	B	A	B	B	A	B	B	A	B	A	B	A	A	B	B	B	B	A	A	A	-	A	-	A
RM20236	B	A	A	A	A	A	A	A	B	B	B	B	B	A	B	A	A	A	A	A	A	A	A	A	A	B	A	B	B	A	B	A	A	A	A	B	A	B	B	B	B	B	A	A	A	-	A	-	B
RM7434	B	A	B	A	A	A	A	A	B	B	-	B	B	A	B	A	A	A	A	A	A	A	B	A	A	B	A	B	B	B	B	A	A	A	A	B	A	B	A	B	B	B	A	A	A	-	B	A	B
RM20414	A	A	B	A	A	A	B	A	B	B	A	B	B	A	B	A	A	B	B	A	A	A	B	A	A	B	B	B	B	A	B	A	A	A	A	B	A	B	B	B	B	B	A	A	A	B	B	A	B
RM20466	A	A	B	A	A	A	B	A	B	B	-	B	B	A	B	A	A	B	B	A	A	A	B	A	A	B	B	B	B	A	B	A	A	A	A	B	A	B	B	B	B	B	A	A	A	B	B	A	A
RM6782	A	A	B	A	A	A	B	A	B	B	-	B	B	A	B	A	A	B	B	A	A	A	B	A	A	B	B	B	B	A	B	A	A	A	A	B	A	B	B	B	B	B	A	A	A	B	A	A	A
JD6007	A	A	B	A	B	A	B	A	B	B	B	B	A	A	B	A	B	B	B	A	A	A	B	A	A	B	B	B	B	A	B	B	B	A	A	B	A	B	A	B	B	B	A	B	A	B	A	B	A
RM3343	A	-	B	A	A	B	B	A	B	A	-	B	A	B	B	A	B	B	B	A	A	A	B	A	A	B	B	B	B	A	B	B	B	A	B	B	A	-	A	B	B	B	A	B	B	B	A	A	A
JD7011	B	B	A	B	-	A	A	B	B	B	A	B	A	A	A	A	B	A	A	A	B	A	A	A	B	B	A	B	A	B	A	A	B	B	B	B	A	A	B	B	A	A	A	A	B	A	B	B	B
RM5055	B	B	A	A	-	A	A	B	-	B	A	B	A	A	A	A	B	A	A	A	B	A	A	A	B	B	A	B	A	B	A	A	B	B	B	B	A	A	B	B	A	A	A	A	B	A	B	B	B
RM3484	B	B	A	B	-	A	A	A	B	B	B	A	A	B	A	A	A	A	B	A	A	B	A	B	B	A	A	B	B	B	B	A	A	B	B	A	A	A	A	B	A	B	A	A	B	B	B	A	B
JD7001	B	B	B	B	-	A	B	A	B	B	B	A	A	B	B	B	A	A	B	A	A	A	A	B	B	B	A	B	B	B	B	A	A	B	-	A	A	A	A	B	B	A	A	A	B	B	B	A	B
JD7002	B	B	B	B	-	A	B	A	B	B	B	A	A	B	B	A	A	A	B	A	A	A	A	B	A	A	A	B	B	B	B	B	A	B	-	A	A	A	B	B	B	A	A	A	B	B	B	A	B
RM5499	B	B	B	B	-	A	B	A	B	B	B	A	A	B	B	A	A	A	B	A	A	A	A	B	A	A	A	B	B	B	B	B	A	B	-	A	A	A	B	B	B	A	A	A	B	B	B	A	B
JD7009	B	B	B	B	-	A	B	A	B	B	B	A	A	B	A	A	A	A	B	A	A	A	A	B	A	A	A	B	B	B	B	B	A	B	-	A	A	A	B	B	B	A	A	A	B	B	B	A	B
JD7010	B	B	B	B	-	A	B	A	B	B	B	A	A	B	A	A	A	A	B	A	A	A	A	B	A	A	A	B	B	B	B	B	A	B	-	A	A	A	B	B	B	A	A	A	B	B	B	A	B
RM5481	B	B	B	B	-	A	B	A	B	B	B	A	A	B	A	A	A	A	B	A	A	A	A	B	A	A	A	B	B	B	B	B	A	B	-	A	A	A	B	B	B	A	A	A	A	B	B	A	B
RM2966	B	B	A	B	-	A	A	A	B	B	B	A	A	B	B	A	A	A	B	A	A	A	A	A	B	A	A	B	A	A	B	B	B	B	A	A	B	A	B	B	B	A	A	A	A	B	B	A	A
RM3826	B	B	A	B	-	A	A	A	B	B	B	A	B	B	B	A	A	A	B	A	A	A	A	A	B	A	A	B	A	A	B	B	B	A	A	A	B	A	B	B	B	A	A	A	A	B	B	A	B
RM2752	A	B	A	A	-	A	A	A	A	B	B	A	B	B	B	A	A	A	B	A	A	A	A	A	B	A	A	B	A	A	B	B	B	A	A	A	B	B	B	B	A	A	A	A	A	B	B	A	B
RM8261	A	B	B	A	-	A	B	B	A	B	A	A	B	B	B	A	B	A	A	A	A	A	B	B	B	A	A	B	B	A	A	B	B	A	A	A	B	B	A	B	A	B	A	-	A	A	B	A	B
JD7012	A	B	A	A	-	A	B	A	A	B	A	A	B	B	A	A	B	A	A	A	B	A	B	B	B	A	A	B	B	A	A	A	B	A	A	A	B	B	A	B	A	B	A	A	A	A	B	A	B
JD7013	A	B	A	A	-	B	B	A	A	B	A	A	B	B	A	A	B	A	A	A	B	A	B	B	B	A	A	B	B	A	A	A	B	A	B	A	B	B	A	B	A	B	A	A	A	A	B	A	A
RM22186	A	A	A	A	-	-	A	-	A	B	B	A	B	B	A	A	B	A	A	A	B	B	B	B	A	A	A	B	A	A	A	B	B	A	B	A	B	B	A	A	A	B	A	A	A	A	B	A	A
JD8009	B	B	B	B	B	A	B	A	B	B	A	B	A	B	A	A	A	A	A	A	B	A	A	A	A	B	A	A	B	A	A	B	B	A	B	B	A	B	A	A	A	A	B	A	A	A	A	A	B
RM8018	A	B	B	B	A	A	B	A	B	B	A	B	A	B	A	A	A	A	A	A	A	A	A	A	A	B	A	A	B	A	A	A	A	A	B	B	A	B	A	A	A	A	B	A	A	A	B	A	B
RM4955	A	B	B	A	A	A	B	A	B	B	A	B	B	B	A	A	A	A	A	A	A	A	A	A	A	B	A	A	B	A	A	B	A	A	B	B	A	-	A	A	B	A	-	A	A	A	B	A	B
RM1148	A	A	B	A	A	A	A	A	A	B	A	B	B	B	B	A	A	A	A	A	A	A	A	A	A	B	A	A	B	A	A	B	A	A	B	B	A	B	A	A	B	A	A	A	A	A	-	A	B
RM5556	A	A	B	A	A	A	A	B	A	B	A	B	A	B	B	A	A	A	A	A	A	A	B	A	A	B	A	A	B	A	A	B	A	A	B	B	A	B	A	A	B	A	A	A	A	A	-	A	B
RM7080	A	A	B	A	A	A	A	B	A	B	A	B	A	B	B	A	A	A	A	A	A	A	B	A	A	B	A	A	B	A	A	B	A	A	B	B	A	B	A	A	B	A	A	A	A	A	-	A	B
RM3481	A	A	A	A	A	A	A	B	A	B	A	B	A	-	B	B	A	A	A	B	A	A	B	A	A	B	A	A	A	A	B	B	A	A	B	A	B	B	A	B	A	A	A	A	A	A	A	A	B
JD8001	A	A	A	A	-	A	A	A	A	B	A	A	A	-	B	B	A	A	B	A	A	A	B	A	A	B	A	A	A	A	B	B	A	A	B	A	B	B	A	B	A	A	A	A	A	B	A	A	B
JD8002	A	A	A	A	-	A	A	A	A	B	A	A	A	-	B	B	A	A	B	A	A	A	B	A	A	B	A	A	A	A	B	B	A	A	B	A	B	B	A	B	A	A	A	A	A	B	A	A	B
JD8003	A	A	A	A	-	A	A	A	A	B	A	A	A	-	B	B	A	A	B	A	A	A	B	A	A	B	A	A	A	A	B	B	A	A	B	A	B	B	A	B	A	A	A	A	A	B	A	A	B
RM23053	B	A	A	A	-	A	B	A	A	B	A	A	A	-	A	B	A	A	B	B	A	B	A	A	A	B	A	A	A	A	B	A	A	A	B	A	B	B	A	B	A	A	A	B	-	B	A	B	B
RM8264	A	A	A	A	-	A	B	A	A	B	A	A	A	-	A	B	A	A	B	B	A	B	A	A	A	B	A	A	A	A	B	B	A	A	B	A	B	B	A	B	A	A	A	B	A	B	A	B	B
RM6976	A	A	B	A	A	A	B	A	A	B	B	A	B	-	A	B	B	A	A	B	A	B	A	B	A	B	A	A	A	A	A	A	B	A	A	A	B	B	A	B	A	A	A	B	-	A	A	B	A
JD8011	A	A	B	A	A	A	B	A	B	B	B	A	B	B	A	B	B	A	A	B	A	B	B	B	A	B	A	A	A	A	A	A	B	A	A	A	A	B	A	B	A	A	A	B	B	A	A	B	A
JD8008	A	B	B	A	B	A	B	A	B	B	B	B	B	B	A	A	A	B	A	B	B	B	B	A	A	A	B	A	B	A	A	A	B	A	A	A	A	-	A	B	B	A	A	B	B	A	A	B	A
JD9008	A	A	B	A	A	B	B	A	B	A	B	B	B	A	A	A	B	B	B	B	A	A	A	A	A	A	B	A	B	A	A	B	A	B	A	B	B	A	A	B	B	B	A	A	B	B	B	A	A
JD9002	A	A	B	A	A	B	B	A	B	A	B	B	B	A	A	A	B	B	B	B	A	A	A	A	A	A	B	A	B	A	A	B	A	B	A	B	B	A	A	B	B	B	A	A	B	B	B	A	A
RM23898	A	B	B	A	A	B	B	B	B	A	B	B	B	A	A	A	B	B	B	B	A	A	A	A	A	A	B	A	B	A	A	B	A	B	A	B	B	A	A	B	B	A	A	A	B	B	B	A	A
RM5526	A	B	B	A	A	B	B	B	B	A	B	B	B	A	A	A	B	B	B	B	A	A	A	A	A	A	B	A	B	A	A	B	A	B	A	B	B	A	A	B	B	A	A	A	B	B	B	A	A
JD9003	A	B	B	A	-	B	B	B	B	B	B	B	B	A	A	A	B	A	A	B	A	A	B	A	A	A	A	A	B	A	A	B	A	B	A	B	B	A	A	B	B	A	A	A	B	A	B	A	A
JD9004	A	B	B	A	-	B	B	B	B	B	B	B	B	A	A	B	B	A	A	B	A	A	B	A	A	A	A	A	B	A	A	B	B	B	A	B	B	A	A	B	B	A	A	A	B	A	B	A	A
JD9005	A	B	B	A	-	A	A	A	A	A	A	A	B	A	A	B	B	A	A	B	A	A	A	A	A	A	A	A	B	A	A	B	B	B	A	A	B	-	A	B	B	A	A	A	B	A	B	A	A
RM24303	A	B	B	B	-	B	B	A	B	B	B	B	B	A	A	B	B	A	A	A	B	A	A	A	A	A	A	A	B	A	A	B	B	A	A	A	B	A	A	B	B	B	A	A	B	A	B	A	B
RM5122	B	B	B	B	-	B	B	A	B	B	B	B	B	A	A	B	B	A	A	A	B	A	A	A	A	A	A	A	B	A	-	B	A	A	A	A	B	A	A	B	B	B	A	A	B	A	B	A	B
JD9011	B	B	B	B	-	B	B	A	B	B	B	B	A	A	B	B	A	A	A	A	B	A	A	B	B	A	A	A	B	A	A	B	A	B	A	A	B	A	A	B	B	B	A	A	B	A	B	B	B
RM3787	B	A	B	B	-	A	B	A	B	B	B	A	A	A	B	B	A	A	B	A	B	A	B	B	B	A	A	A	B	A	A	B	A	B	A	A	A	-	A	A	B	B	A	A	B	B	B	B	B
RM205	A	A	A	B	-	A	A	A	B	B	A	A	A	A	B	B	A	A	B	A	B	A	B	A	B	B	A	A	B	A	B	B	A	B	A	B	A	-	B	B	B	B	A	B	B	B	B	B	B
JD10001	B	A	B	A	-	A	B	A	B	B	B	B	A	A	B	-	A	B	B	A	A	A	A	A	A	B	B	A	B	A	B	B	A	B	B	B	B	-	A	B	B	A	B	A	B	B	A	A	B
JD10002	B	A	A	A	-	A	B	A	B	B	B	B	A	A	B	B	A	B	B	A	A	A	A	A	A	B	B	A	B	A	B	B	A	B	B	B	B	-	A	B	B	A	B	A	B	B	A	A	B
JD10003	B	A	A	A	-	B	A	A	B	B	B	B	A	B	B	B	A	B	B	A	A	A	B	A	A	B	B	A	B	A	B	B	A	B	B	B	B	-	A	B	B	A	B	A	B	B	A	A	B
JD10004	B	A	A	A	-	B	A	A	B	B	B	B	B	B	B	B	B	B	B	B	A	A	B	A	A	B	B	A	B	A	B	B	A	B	B	B	B	A	A	A	B	A	B	-	B	B	A	A	A
JD10005	B	A	A	A	-	B	A	A	B	B	B	B	B	B	B	B	B	B	B	B	A	B	B	A	B	B	B	A	B	A	B	B	A	B	B	B	B	A	A	A	B	A	B	-	B	B	A	A	A
RM3152	B	A	A	A	-	B	A	A	A	B	B	B	B	B	B	B	B	B	B	B	A	A	B	A	B	B	B	A	A	A	B	B	A	B	B	A	B	A	A	A	B	A	B	-	B	B	A	A	A
RM4455	B	A	A	A	A	B	A	A	B	B	B	B	A	B	B	B	B	B	B	B	A	A	B	A	B	B	B	A	A	A	B	B	B	B	B	A	B	A	A	A	B	A	B	B	B	B	A	A	-
RM1375	A	A	A	B	A	A	A	B	B	A	A	B	A	B	B	B	-	B	B	B	A	A	B	B	A	A	B	A	B	A	B	B	B	B	A	A	B	-	B	A	B	A	B	B	A	B	B	B	A
RM6745	B	B	B	A	A	A	A	B	B	A	A	B	A	B	B	B	B	B	B	B	A	A	B	B	A	A	B	A	A	B	B	B	A	B	A	B	B	B	B	A	B	A	B	B	B	B	B	B	-
RM2371	B	B	B	A	A	A	A	B	B	A	A	B	A	B	B	B	B	B	B	B	A	A	B	B	A	B	B	A	A	B	-	B	A	B	A	B	B	B	B	A	B	A	B	B	B	B	B	B	B
RM6673	A	B	B	B	-	A	B	B	B	A	A	A	A	A	A	B	B	B	A	B	B	B	B	B	A	A	B	A	A	B	B	A	B	B	B	B	B	-	B	B	B	A	B	B	B	A	B	B	B
RM3668	A	A	A	B	-	B	A	B	A	A	B	B	A	B	B	B	A	B	A	A	A	B	B	B	B	A	B	B	A	B	A	B	B	A	A	A	A	-	A	A	A	B	A	B	A	A	A	B	A
RM5599	A	A	A	A	-	B	A	B	-	B	B	A	A	B	B	B	A	B	A	A	A	B	A	A	B	A	B	B	A	B	A	A	A	A	A	A	A	A	A	A	B	A	A	B	A	A	A	B	B
RM3133	B	A	B	B	-	B	A	A	-	B	B	A	A	A	B	B	B	B	A	A	A	A	A	B	B	A	B	B	A	A	A	A	A	A	A	A	B	A	A	B	B	A	A	B	A	A	A	B	B
RM5731	A	B	B	B	-	B	A	A	-	B	B	A	A	-	B	B	B	A	A	B	A	A	A	B	A	A	A	B	A	A	A	A	A	A	A	A	B	-	A	A	B	B	B	B	A	A	A	B	B
JD11002	A	B	B	B	-	B	A	A	-	B	B	A	A	A	B	B	B	A	A	B	A	A	A	B	A	A	A	B	A	A	A	A	A	A	A	A	B	-	A	A	B	B	B	B	A	A	A	B	B
RM26622	A	B	B	B	-	B	A	A	-	B	B	A	A	A	B	B	B	A	A	B	A	A	A	B	A	A	A	B	A	A	A	A	A	A	A	A	B	-	A	A	B	B	B	B	A	A	A	B	B
RM1355	A	B	B	B	-	B	A	A	B	B	B	A	A	A	B	B	B	A	A	B	A	A	A	B	A	A	A	B	A	A	A	A	A	A	A	A	B	B	A	B	B	B	B	B	A	A	A	B	B
RM26851	A	B	B	B	B	B	A	B	A	B	B	A	A	A	B	A	B	A	A	B	B	A	A	B	B	A	A	B	A	A	B	A	B	A	B	A	B	B	A	B	B	B	B	B	A	A	A	B	B
RM5961	A	B	B	B	B	B	A	B	A	B	B	A	A	A	B	A	B	A	A	B	B	A	A	B	B	B	A	B	A	A	B	A	B	A	B	A	B	B	A	B	B	B	B	B	A	A	A	B	B
RM2596	A	B	B	B	B	B	A	B	A	B	B	A	A	A	B	A	B	A	A	B	B	A	A	B	B	A	A	B	A	A	B	A	B	A	B	A	B	B	A	B	B	B	B	B	A	A	A	B	B
RM26969	A	B	B	B	B	B	A	-	A	B	B	A	B	B	B	A	B	A	A	B	B	A	A	B	B	A	A	B	A	A	B	A	B	B	B	A	A	B	A	B	-	A	B	B	A	A	A	B	B
RM206	A	B	B	B	B	B	A	-	A	B	B	A	B	B	B	A	B	A	A	B	B	A	A	B	B	A	A	B	A	A	B	A	B	B	B	A	A	B	A	B	-	A	B	B	A	A	A	B	B
RM26999	A	B	B	B	B	B	A	-	A	B	B	A	B	B	B	A	B	A	A	B	B	A	A	B	B	A	A	B	A	A	B	A	B	B	B	A	A	B	A	B	-	A	B	B	A	A	A	B	B
RM27027	A	B	B	B	B	B	A	A	A	B	B	A	B	B	B	A	B	A	A	B	B	A	A	B	B	A	A	B	A	A	B	A	B	B	B	A	A	B	A	B	A	A	B	B	A	A	A	B	B
RM5997	A	B	B	B	B	B	A	-	A	B	A	A	B	B	B	A	B	A	A	B	B	A	A	B	B	A	A	B	A	A	B	A	B	B	B	A	A	B	A	B	-	A	B	B	A	A	A	B	B
JD11003	A	B	B	B	B	B	B	A	A	B	A	A	B	B	B	A	B	A	A	A	B	A	A	B	B	A	A	A	B	A	B	A	B	-	B	A	A	B	A	B	A	A	B	B	A	A	A	B	B
RM2136	A	B	A	A	A	A	A	B	A	A	A	B	B	B	B	A	B	A	B	A	B	A	A	B	B	A	A	A	A	A	B	A	B	B	B	A	A	B	-	B	A	B	B	B	A	B	A	B	B
JD12014	B	B	A	A	B	A	A	A	B	A	B	A	B	A	A	A	A	A	A	B	A	A	A	B	A	B	A	B	A	B	A	A	A	A	B	A	A	A	A	A	A	B	A	B	A	A	A	A	A
JD12016	B	B	A	A	B	A	A	A	B	A	A	A	B	A	A	A	A	A	A	B	A	A	A	B	A	B	A	B	A	B	A	A	A	A	B	A	A	A	A	A	A	B	A	B	A	A	A	A	A
JD12007	B	B	A	A	B	A	A	A	B	A	A	A	A	A	A	A	A	A	A	B	A	A	A	B	A	B	A	B	A	B	A	A	A	A	B	A	A	A	A	A	A	B	A	B	A	A	A	A	A
JD12010	B	B	A	A	B	A	A	A	B	A	A	A	A	A	A	A	A	A	A	A	A	A	A	B	A	B	A	B	A	B	A	A	A	A	B	A	A	A	A	A	A	B	A	A	B	A	A	B	A
JD12013	B	B	A	A	B	A	A	A	B	A	A	A	A	A	A	A	A	A	A	A	A	A	A	B	A	B	A	B	A	B	A	A	A	A	B	A	A	A	A	A	A	B	A	A	B	A	A	B	A
JD12008	B	B	A	A	B	A	A	A	B	A	A	A	A	A	A	A	A	A	A	A	A	A	A	B	A	B	A	B	A	B	A	A	A	A	B	A	A	A	A	A	A	B	A	A	B	A	A	B	A
RM5927	B	B	A	A	B	B	A	A	B	A	A	A	A	A	A	A	A	B	B	A	A	A	A	B	A	B	A	B	A	B	A	A	A	A	B	A	A	A	A	A	A	B	A	A	B	A	A	B	A
JD12018	B	B	B	B	-	B	A	A	B	B	A	A	B	B	A	B	A	A	-	B	A	A	A	B	A	B	A	B	A	B	A	A	A	B	B	B	A	B	A	A	A	B	B	A	B	A	-	B	A
RM27808	B	B	B	B	-	B	A	A	B	B	A	A	B	B	A	B	A	A	-	A	A	A	B	B	B	B	A	B	A	B	B	A	A	B	B	B	A	B	A	A	A	A	B	A	B	A	-	B	A
RM3103	B	-	B	B	-	B	A	A	B	B	A	A	B	B	B	A	A	A	-	A	A	A	B	B	B	B	A	B	A	B	B	A	A	B	B	B	A	B	A	A	A	A	B	A	B	A	-	B	A
RM1337	B	B	B	B	-	B	A	A	B	B	A	A	B	B	A	B	A	A	B	A	A	A	B	B	B	B	A	A	A	B	B	A	A	B	B	B	A	B	B	A	A	A	B	A	B	B	-	B	A
JD12004	B	B	B	B	-	A	A	A	B	B	A	A	B	B	A	B	A	A	B	A	A	A	B	B	B	B	A	A	A	B	B	B	A	B	B	B	A	B	B	A	A	A	B	A	A	B	A	B	A
RM1261	B	B	B	B	-	B	A	A	B	B	-	A	B	B	A	B	A	A	B	A	A	A	B	B	B	B	A	A	A	A	B	B	A	B	B	B	A	B	B	A	A	A	B	A	A	B	A	B	A
RM1246	B	B	A	B	-	B	A	A	B	B	A	A	A	B	A	B	A	A	B	A	A	A	B	A	B	B	A	A	A	A	B	B	A	A	B	B	A	B	A	A	A	A	B	B	A	B	A	B	A
RM1986	B	B	A	B	A	B	A	A	B	A	A	A	B	A	A	A	A	A	B	A	A	A	B	A	B	B	A	A	A	A	B	B	A	A	A	B	A	B	A	A	A	A	B	A	A	B	A	B	A
RM1015	A	B	A	A	A	B	A	A	B	A	A	A	B	A	A	A	A	A	B	A	A	A	B	A	B	B	A	A	A	A	A	B	A	A	A	A	B	-	A	B	A	A	A	A	A	B	A	B	A
RM1103	A	B	A	A	A	B	A	A	B	A	A	A	B	A	A	A	A	A	B	A	A	A	A	A	B	B	A	A	A	A	A	B	A	A	A	A	B	-	A	B	A	A	A	B	A	B	A	B	A
JD12020	A	A	A	A	A	A	A	A	B	A	A	A	-	B	A	A	A	A	B	A	-	A	A	A	B	B	A	A	A	A	A	B	A	B	A	A	A	A	A	A	A	A	B	B	A	B	A	B	A
RM1226	A	A	B	A	-	A	A	A	A	A	A	-	-	B	A	A	A	A	A	A	A	A	A	B	B	B	A	A	B	A	A	B	A	B	A	A	A	A	A	A	A	A	B	B	A	A	A	B	A
Heading date	74	74	83	81	83	83	95	88	81	88	76	95	90	81	97	74	81	74	74	85	78	74	90	83	83	99	85	74	81	78	68	88	83	81	88	113	81	95	71	83	90	81	81	85	76	74	81	85	95
Panicle length	24.6	23.6	30	25.4	24.4	29.7	20.6	28.3	26.8	20.6	24.6	23.7	33.6	22.4	20.3	29	22.8	28.5	28	25.5	23	20.1	28.9	27.8	27	24.6	27.2	22	27.3	25.3	24.8	26.4	30.2	27	25.9	23.8	27.8	27	25.52	30	27	25.6	26.3	28.2	25.1	24.1	28.2	24	27.8
Number of primary branches	8	8	10	8	9	9	10	12	8	8	10	9	13	11	6	9	15	9	10	11	11	11	10	11	8	9	13	6	13	8	8	16	13	11	9	8	13	10	11	12	10	9	11	10	10	9	12	8	13
Number of secondary branches	28	11	16	8	26	27	23	43	9	15	23	25	23	30	7	16	42	12	39	28	35	6	25	25	31	10	34	21	49	28	7	31	56	42	29	15	39	43	23	53	33	27	34	41	29	24	34	25	44
Number of grains per panicle	140	77	107	66	141	147	111	212	76	82	125	138	138	139	60	101	199	89	87	126	163	77	142	139	150	83	179	101	210	129	60	199	255	190	155	101	182	188	174	226	139	119	159	189	151	122	167	117	188
Number of panicles per plant	12.1667	13.75	11.4	10.6	12.6667	11	10.25	14.3333	18.25	9.71429	8.4	7.66667	6.47059	15.5	9.08333	11.75	9.25	8.875	10	9.125	15.8333	14.5	10.6923	9	9.71429	13.5	7.875	9.85714	5.83333	12.5	10.7778	12.375	12.75	11.6667	17.1667	13.1667	11	15.9	16	13.5	7.625	11.3333	18	12.5	14.5	11.1667	14	16	6.125
Number of filled grains per plant	165.5	576	192.667	170.533	463	691.167	450.25	968.5	801	113	21.4667	265.2	94.1176	873.833	199.75	78.875	297.125	411.25	646.667	489.625	1043.83	527.833	520.154	413.875	48.7857	784.25	333.375	41.7857	342	694.167	23	698.875	581.625	875	786	580.5	0.363636	406.2	465	1148.83	550	666.167	1025.83	974.167	526.75	639.5	154.556	1051.5	638.25
Seed-setting rate	11.9365	54.2628	24.8688	32.6817	40.877	56.3145	58.2848	48.2641	62.1291	18.5029	2.56431	38.3459	16.8848	45.1593	40.6616	7.77381	19.63	36.2096	45.0848	36.138	51.4161	47.0719	42.4882	33.7238	5.97812	78.3662	34.5064	3.43875	43.0189	50.1324	2.40097	39.4928	28.3564	57.5027	46.7811	66.4188	0.0261677	17.7063	33.4132	59.2437	53.8754	45.6383	61.3843	58.7142	41.4601	41.4721	11.5666	72.4236	97.9099
Grain yield per plant	4.03817	16.159	6.82487	6.78993	11.0747	21.1345	10.9692	20.519	22.7007	4.09521	0.610333	6.50067	3.24876	18.654	6.869	2.74587	9.69125	13.5047	16.1698	12.3981	19.7432	16.8277	18.1979	12.7459	0.911214	25.9592	7.669	1.3565	11.2147	20.6098	0.643111	21.9901	13.0241	27.6085	21.4077	23.1258	0.00972727	8.7588	12.5487	20.7708	25.9571	16.3927	27.068	20.7337	14.5598	15.6857	5.02678	26.6384	15.5328
[truncated: 231 more columns]
